# Supplementary material for: An efficient synthetic method for allyl-epoxides via allylation of α-haloketones or esters with allylmagnesium bromide
Source: Royal Society of Chemistry journal article supplement (doi:10.1039/c2ob00051b), 2012-01-01

## Supporting Information

# Efficient Synthetic Method of Allyl-Epoxides via Allylation of $\alpha$ -Haloketones or Esters with Allylmagnesium Bromide

Liyuan Fan, Min Zhang and Songlin Zhang\*

*Key Laboratory of Organic Synthesis of Jiangsu Province, College of Chemistry,  
Chemical Engineering and Materials Science, Dushu Lake Campus, Soochow  
University, Suzhou, 215123, People's Republic of China.  
[zhangsl@suda.edu.cn](mailto:zhangsl@suda.edu.cn)*

## Table of Contents

|                                                  |         |
|--------------------------------------------------|---------|
| General Information                              | page S2 |
| Synthesis of allylmagnesium bromide and epoxides | page S3 |
| Analytical and spectral data for compounds       | page S3 |
| NMR spectrum of compounds                        | page S6 |

### General Information

Metallic magnesium and all other chemicals were purchased from Aldrich, Alfa or Acros chemical company and used thus, without further purification. Solvents were purchased from commercial source, without further purification before use. Petroleum ether (PE) used refers to the 60-90 °C boiling point fraction of petroleum. Tetrahydrofuran was distilled from sodium and benzophenone immediately prior to use. All reactions were conducted under a nitrogen atmosphere. The flash column chromatography was carried out on Merck silica gel (300-400 mesh).  $^1\text{H}$  and  $^{13}\text{C}$  NMR spectra were recorded in  $\text{CDCl}_3$  on a Varian Mercury 300 or 400 MHz spectrometer. Chemical shifts in  $^1\text{H}$  NMR spectra are reported in parts per million (ppm,  $\delta$ ) downfield from the internal standard  $\text{Me}_4\text{Si}$  (TMS). Chemical shifts in  $^{13}\text{C}$  NMR spectra are reported relative to the central line of the chloroform signal ( $\delta = 77.50$  ppm). IR spectra were recorded on Varian F-1000 spectrometer in KBr with absorptions in  $\text{cm}^{-1}$ . HRMS were obtained with a GCT-TOF instrument.

## Synthesis of allylmagnesium bromide and epoxides

### *The preparation of allylmagnesium bromide and its concentration of calibration*

Magnesium turnings (1.06g, 44mmol) and spiked with I<sub>2</sub> were added to a round-bottom flask assembled with a constant pressure funnel, which had been previously flame dried and allowed to cool under a stream of nitrogen. Freshly distilled THF (40 mL) mixed with allyl bromide (3.4mL, 40mmol) in the constant pressure funnel was slowly added to the flask. After several minutes, the reaction mixture turned from yellow to turbid gray. Then, the round-bottom flask was cooled to 0 °C with an ice bath. After dropping was finished, the reaction was stirred for 3 hours at the room temperature. The solvent transfers were made using standard cannulation techniques. The concentration of Grignard reagent was determined by titration, using sodium hydroxide (0.10M) as titrant and phenolphthalein as indicator.

### *General procedure for the synthesis of epoxides*

Allylmagnesium bromide (the amounts can be seen from the feet of the **table 1, 2**) was added to  $\alpha$ -haloketones or esters (0.5 mmol) in dry THF (5 mL) under a nitrogen atmosphere at room temperature. The reaction mixture was stirred for 0.5 h (the reaction was monitored by TLC) and then was quenched with water. The resulting mixture was extracted with diethyl ether (3×10 mL), and dried over anhydrous Na<sub>2</sub>SO<sub>4</sub>. The solvent was removed by evaporation under reduced pressure. Purification by column chromatography on silica gel afforded epoxides **3** or **5** (300–400 mesh, petroleum ether and ethyl acetate).

### Analytical and spectral data for compounds

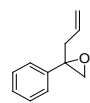

**2-allyl-2-phenyloxirane (3a)**<sup>9</sup> The title compound was obtained according to the general procedure. Colourless oil; Yield: 94%; IR (KBr): 3060, 2918, 1648, 1490, 1407, 1001, 920, 777, 709 cm<sup>-1</sup>; <sup>1</sup>H NMR (CDCl<sub>3</sub>, 300 MHz):  $\delta$  7.22–7.39 (m, 5H), 5.70–5.84 (m, 1H), 5.06–5.15 (m, 2H), 2.98 (d,  $J$  = 5.3 Hz, 1H), 2.88 (dd,  $J$  = 6.5, 15.0 Hz, 1H), 2.74 (d,  $J$  = 5.3 Hz, 1H), 2.64 (dd,  $J$  = 7.3, 15.0 Hz, 1H). <sup>13</sup>C NMR (CDCl<sub>3</sub>, 75 MHz):  $\delta$  140.29, 133.02, 128.55, 127.77, 126.19, 118.71, 59.55, 55.03, 39.75. HRMS (EI<sup>+</sup>) calcd for C<sub>11</sub>H<sub>12</sub>O (M<sup>+</sup>): 160.0888; found: 160.0885.

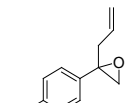

**2-allyl-2-(4-chlorophenyl) oxirane (3b)**<sup>9</sup> The title compound was obtained according to the general procedure. Colourless oil; Yield: 95%; IR (KBr): 3068, 2915, 1642, 1492, 1410, 1004, 919, 820 cm<sup>-1</sup>; <sup>1</sup>H NMR (CDCl<sub>3</sub>, 400 MHz):  $\delta$  7.31 (s, 4H), 5.72–5.79 (m, 1H), 5.09–5.15 (m, 2H), 3.01 (d,  $J$  = 5.1 Hz, 1H), 2.88 (dd,  $J$  = 6.4, 15.0 Hz, 1H), 2.73 (d,  $J$  = 5.1 Hz, 1H), 2.61 (dd,  $J$  = 7.1, 15.0 Hz, 1H). <sup>13</sup>C NMR (CDCl<sub>3</sub>, 75 MHz):  $\delta$  138.96, 133.79, 132.82, 128.91, 127.81, 119.22, 59.33, 55.36, 39.79. HRMS (EI<sup>+</sup>) calcd for C<sub>11</sub>H<sub>11</sub><sup>35</sup>ClO (M<sup>+</sup>): 194.0498; found: 194.0499; C<sub>11</sub>H<sub>11</sub><sup>37</sup>ClO (M<sup>+</sup>-C<sub>3</sub>H<sub>5</sub>): 155.0078; found: 155.0475.

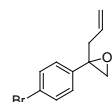

**2-allyl-2-(4-bromophenyl) oxirane (3c)**<sup>9</sup> The title compound was obtained according to the general procedure. Colourless oil; Yield: 96%; IR (KBr): 3067, 2910, 1658, 1489, 1415, 999, 915, 823 cm<sup>-1</sup>; <sup>1</sup>H NMR (CDCl<sub>3</sub>, 400 MHz):  $\delta$  7.45–7.47 (m, 2H), 7.24–7.26 (m, 2H), 5.70–5.80

(m, 1H), 5.09–5.15 (m, 2H), 3.01 (d,  $J = 5.3$  Hz, 1H), 2.85–2.90 (m, 1H), 2.72 (d,  $J = 5.3$  Hz, 1H), 2.61 (dd,  $J = 7.3, 15.0$  Hz, 1H).  $^{13}\text{C}$  NMR ( $\text{CDCl}_3$ , 75 MHz):  $\delta$  139.35, 132.62, 131.66, 127.98, 121.74, 119.03, 59.14, 55.10, 39.51. HRMS ( $\text{EI}^+$ ) calcd for  $\text{C}_{11}\text{H}_{11}^{79}\text{BrO}$  ( $\text{M}^+$ ): 237.9993; found: 237.9953;  $\text{C}_{11}\text{H}_{11}^{81}\text{BrO}$  ( $\text{M}^+$ ): 239.9973; found: 239.9969.

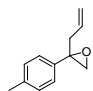

**2-allyl-2-p-tolyloxirane (3d)**<sup>9</sup> The title compound was obtained according to the general procedure. Colourless oil; Yield: 81%; IR (KBr): 3050, 2965, 2869, 1670, 1487, 1405, 1000, 922, 840  $\text{cm}^{-1}$ ;  $^1\text{H}$  NMR ( $\text{CDCl}_3$ , 400 MHz):  $\delta$  7.27 (d,  $J = 8.1$  Hz, 2H), 7.15 (d,  $J = 8.0$  Hz, 2H), 5.73–5.83 (m, 1H), 5.07–5.15 (m, 2H), 2.99 (d,  $J = 5.3$  Hz, 1H), 2.88 (dd,  $J = 6.5, 15.0$  Hz, 1H), 2.75 (d,  $J = 5.3$  Hz, 1H), 2.64 (dd,  $J = 7.3, 14.9$  Hz, 1H), 2.34 (s, 3H).  $^{13}\text{C}$  NMR ( $\text{CDCl}_3$ , 100 MHz):  $\delta$  137.67, 137.38, 133.31, 129.44, 126.29, 118.84, 59.67, 55.35, 39.98, 21.58. HRMS ( $\text{EI}^+$ ) calcd for  $\text{C}_{12}\text{H}_{14}\text{O}$  ( $\text{M}^+$ ): 174.1045; found: 174.1043.

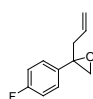

**2-allyl-2-(4-fluorophenyl) oxirane (3e)**<sup>9</sup> The title compound was obtained according to the general procedure. Colourless oil; Yield: 94%; IR (KBr): 3064, 2923, 1640, 1505, 1421, 989, 915, 827  $\text{cm}^{-1}$ ;  $^1\text{H}$  NMR ( $\text{CDCl}_3$ , 400 MHz):  $\delta$  7.32–7.36 (m, 2H), 6.99–7.04 (m, 2H), 5.71–5.81 (m, 1H), 5.09–5.15 (m, 2H), 3.00 (d,  $J = 5.3$  Hz, 1H), 2.86 (dd,  $J = 6.5, 15.0$  Hz, 1H), 2.73 (d,  $J = 5.3$  Hz, 1H), 2.63 (dd,  $J = 7.3, 15.0$  Hz, 1H).  $^{13}\text{C}$  NMR ( $\text{CDCl}_3$ , 100 MHz):  $\delta$  162.59 ( $^1J(\text{C}, \text{F}) = 244.5$  Hz), 136.21 ( $^4J(\text{C}, \text{F}) = 3.0$  Hz), 133.00, 128.17 ( $^3J(\text{C}, \text{F}) = 8.1$  Hz), 119.14, 115.64 ( $^2J(\text{C}, \text{F}) = 21.4$  Hz), 59.43, 55.31, 40.09. HRMS ( $\text{EI}^+$ ) calcd for  $\text{C}_{11}\text{H}_{11}\text{OF}$  ( $\text{M}^+$ ): 178.0794; found: 178.0794.

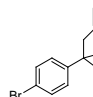

**2-allyl-2-(4-bromophenyl)-3-methyloxirane (3f)**<sup>9</sup> The title compound was obtained according to the general procedure. Colourless oil; Yield: 95%; IR (KBr): 3067, 2950, 2855, 1657, 1476, 1395, 985, 923, 834  $\text{cm}^{-1}$ ;  $^1\text{H}$  NMR ( $\text{CDCl}_3$ , 400 MHz):  $\delta$  7.43–7.48 (m, 2H), 7.18–7.24 (m, 2H), 5.66–5.80 (m, 1H), 5.04–5.11 (m, 2H), 3.21 (q,  $J = 5.4$  Hz, 1H; cis), 2.96 (q,  $J = 5.5$  Hz, 1H; trans), 2.78–2.85 (m, 1H; cis, trans), 2.56 (dd,  $J = 6.6, 15.3$  Hz, 1H; trans), 2.47 (dd,  $J = 7.4, 14.7$  Hz, 1H; cis), 1.46 (d,  $J = 5.5$  Hz, 3H; trans), 0.99 (d,  $J = 5.4$  Hz, 3H; cis).  $^{13}\text{C}$  NMR ( $\text{CDCl}_3$ , 100 MHz): cis:  $\delta$  137.82, 132.90, 131.63, 129.30, 121.70, 119.05, 65.08, 59.86, 42.23, 14.88; trans:  $\delta$  140.77, 133.32, 131.76, 128.26, 121.66, 118.82, 63.12, 62.62, 36.25, 14.88. HRMS ( $\text{EI}^+$ ) calcd for  $\text{C}_{12}\text{H}_{13}^{79}\text{BrO}$  ( $\text{M}^+$ ): 252.0150; found: 252.0153;  $\text{C}_{12}\text{H}_{13}^{81}\text{BrO}$  ( $\text{M}^+$ ): 254.0129; found: 254.0120.

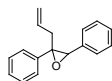

**2-allyl-2,3-diphenyloxirane (3g)**<sup>9</sup> The title compound was obtained according to the general procedure. Colourless oil; Yield: 18%; IR (KBr): 3073, 2921, 1645, 1487, 1407, 977, 923, 791, 686  $\text{cm}^{-1}$ ;  $^1\text{H}$  NMR ( $\text{CDCl}_3$ , 300 MHz): cis:  $\delta$  7.01–7.25 (m, 10H), 5.76–5.90 (m, 1H), 5.10–5.16 (m, 2H), 4.19 (s, 1H), 2.88 (dd,  $J = 6.5, 14.4$  Hz, 1H), 2.69 (dd,  $J = 7.5, 14.4$  Hz, 1H).  $^{13}\text{C}$  NMR ( $\text{CDCl}_3$ , 75 MHz):  $\delta$  137.09, 135.57, 132.73, 127.91, 127.86, 127.82, 127.56, 127.40, 126.74, 118.92, 68.58, 63.92, 43.32. HRMS ( $\text{EI}^+$ ) calcd for  $\text{C}_{17}\text{H}_{16}\text{O}$  ( $\text{M}^+$ ): 236.1201; found: 236.1201.

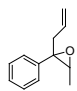

**2-allyl-3-methyl-2-phenyl-oxirane (3h)**<sup>9</sup> The title compound was obtained according to the general procedure. Colourless oil; Yield: 91%; IR (KBr): 3069, 2954, 2858, 1674, 1487, 1408, 976, 907, 765, 715  $\text{cm}^{-1}$ ; <sup>1</sup>H NMR ( $\text{CDCl}_3$ , 400 MHz):  $\delta$  7.25–7.36 (m, 5H), 5.68–5.79 (m, 1H), 5.03–5.08 (m, 2H), 3.21 (q,  $J = 5.4$  Hz, 1H; cis), 3.01 (q,  $J = 5.5$  Hz, 1H; trans), 2.84 (dd,  $J = 6.6$ , 14.6 Hz, 1H; cis, trans), 2.59 (dd,  $J = 6.6$ , 15.2 Hz, 1H; trans), 2.50 (dd,  $J = 7.5$ , 14.7 Hz, 1H; cis), 1.47 (d,  $J = 5.5$  Hz, 3H; trans), 0.98 (d,  $J = 5.4$  Hz, 3H; cis). <sup>13</sup>C NMR ( $\text{CDCl}_3$ , 100 MHz): cis:  $\delta$  138.69, 133.23, 128.42, 127.63, 127.43, 118.67, 65.45, 59.75, 42.43, 14.93; trans:  $\delta$  138.69, 133.23, 128.61, 127.72, 126.40, 118.42, 62.54, 62.27, 36.42, 14.93. HRMS ( $\text{EI}^+$ ) calcd for  $\text{C}_{12}\text{H}_{14}\text{O}$  ( $\text{M}^+$ ): 174.1045; found: 174.1045.

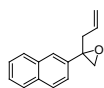

**2-allyl-2-(naphthalen-2-yl) oxirane (3i)**<sup>9</sup> The title compound was obtained according to the general procedure. Colourless oil; Yield: 94%; IR (KBr): 3053, 2899, 1632, 1489, 1356, 1001, 928, 818, 741  $\text{cm}^{-1}$ ; <sup>1</sup>H NMR ( $\text{CDCl}_3$ , 400 MHz):  $\delta$  7.81–7.86 (m, 4H), 7.47–7.49 (m, 3H), 5.77–5.87 (m, 1H), 5.09–5.18 (m, 2H), 3.09 (d,  $J = 5.2$  Hz, 1H), 3.01 (dd,  $J = 6.4$ , 15.0 Hz, 1H), 2.85 (d,  $J = 5.2$  Hz, 1H), 2.74 (dd,  $J = 7.2$ , 15.0 Hz, 1H). <sup>13</sup>C NMR ( $\text{CDCl}_3$ , 75 MHz):  $\delta$  137.89, 133.53, 133.16, 128.50, 128.41, 128.07, 126.68, 126.46, 125.46, 124.23, 119.01, 60.02, 55.42, 40.00. HRMS ( $\text{EI}^+$ ) calcd for  $\text{C}_{15}\text{H}_{14}\text{O}$  ( $\text{M}^+$ ): 210.1045; found: 210.1040.

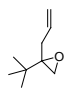

**2-allyl-2-tert-butyl-oxirane (3j)**<sup>9</sup> The title compound was obtained according to the general procedure. Colourless oil; Yield: 86% (**3ja**) and 80% (**3jb**); IR (KBr): 2960, 1640, 1474, 1371, 996, 914, 818  $\text{cm}^{-1}$ ; <sup>1</sup>H NMR ( $\text{CDCl}_3$ , 400 MHz):  $\delta$  5.63–5.73 (m, 1H), 5.03–5.07 (m, 2H), 2.71 (d,  $J = 4.3$  Hz, 1H), 2.50–2.55 (m, 3H), 0.96 (s, 9H). <sup>13</sup>C NMR ( $\text{CDCl}_3$ , 100 MHz):  $\delta$  134.48, 118.07, 63.59, 48.35, 35.01, 34.20, 26.54. HRMS ( $\text{EI}^+$ ) calcd for  $\text{C}_9\text{H}_{16}\text{O}$  ( $\text{M}^+ - \text{H}_2\text{O}$ ): 122.1096; found: 122.1096.

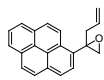

**2-allyl-2-(pyren-1-yl) oxirane (3k)**<sup>10</sup> The title compound was obtained according to the general procedure. Colourless oil; Yield: 75%; IR (KBr): 3073, 2904, 1647, 1496, 1370, 982, 899, 809, 729  $\text{cm}^{-1}$ ; <sup>1</sup>H NMR ( $\text{CDCl}_3$ , 400 MHz):  $\delta$  8.32 (d,  $J = 9.0$  Hz, 1H), 7.91–8.14 (m, 8H), 5.72–5.85 (m, 1H), 5.00–5.06 (m, 2H), 3.28 (d,  $J = 5.2$  Hz, 1H), 3.02 (d,  $J = 5.2$  Hz, 1H), 2.95 (dd,  $J = 6.6$ , 14.1 Hz, 1H), 2.84 (dd,  $J = 7.5$ , 14.3 Hz, 1H). <sup>13</sup>C NMR ( $\text{CDCl}_3$ , 100 MHz):  $\delta$  134.02, 132.79, 131.48, 131.15, 130.91, 128.33, 128.17, 127.72, 127.62, 126.28, 125.85, 125.67, 125.55, 124.97, 124.83, 124.76, 123.72, 118.98, 61.03, 53.30, 42.31. HRMS ( $\text{EI}^+$ ) calcd for  $\text{C}_{21}\text{H}_{16}\text{O}$  ( $\text{M}^+$ ): 284.1201; found: 284.1201.

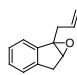

**6H-Indeno [1,2-b]oxirene, 1a,6a-dihydro-1a-allyl- (3l)** The title compound was obtained according to the general procedure. Colourless oil; Yield: 80%; Compound purity: 99.40% (confirmed by HPLC); IR (KBr): 3074, 2977, 2918, 2851, 1639, 1609, 1476, 1436, 1343, 1253, 1152, 1065, 997, 920, 736  $\text{cm}^{-1}$ ; <sup>1</sup>H NMR ( $\text{CDCl}_3$ , 300 MHz):  $\delta$  7.40–7.42 (m, 1H), 7.21–7.31 (m, 3H), 5.70–5.84 (m, 1H), 5.10–5.17 (m, 2H), 4.67–4.70 (t, 1H), 3.29–3.47 (m, 2H), 2.56–2.66 (m, 2H). <sup>13</sup>C NMR ( $\text{CDCl}_3$ , 75 MHz):  $\delta$  143.23, 139.77, 133.31, 129.23, 127.71, 125.13, 124.20,

119.34, 81.80, 61.06, 42.05, 40.44. HRMS (EI<sup>+</sup>) calcd for C<sub>9</sub>H<sub>16</sub>O (M<sup>+</sup>): 172.0888; found: 172.0890.

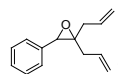

**2,2-diallyl-3-phenyloxirane (5a)** The title compound was obtained according to the general procedure. Colourless oil; Yield: 85% (**5aa**), 73% (**5ab**) and 23% (**5ac**); Compound purity: 99.12% (**5aa**), 99.85% (**5ab**), 99.54% (**5ac**) (confirmed by HPLC); IR (KBr): 3078, 2979, 2912, 2846, 1641, 1605, 1497, 1434, 1346, 1263, 1178, 1028, 971, 917, 859, 750, 700, 653 cm<sup>-1</sup>; <sup>1</sup>H NMR (CDCl<sub>3</sub>, 300 MHz): δ 7.27–7.40 (m, 5H), 5.83–5.97 (m, 1H), 5.60–5.73 (m, 1H), 5.17–5.23 (m, 2H), 4.93–5.06 (m, 2H), 3.98 (s, 1H), 2.45–2.60 (m, 2H), 2.03–2.21 (m, 2H). <sup>13</sup>C NMR (CDCl<sub>3</sub>, 75 MHz): δ 136.19, 133.20, 128.28, 127.70, 126.65, 118.69, 118.33, 65.03, 62.75, 39.45, 34.47. HRMS (EI<sup>+</sup>) calcd for C<sub>14</sub>H<sub>16</sub>O (M<sup>+</sup>): 200.1201; found: 201.1205.

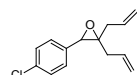

**2,2-diallyl-3-(4-chlorophenyl) oxirane (5b)** The title compound was obtained according to the general procedure. Colourless oil; Yield: 83%; Compound purity: 99.50% (confirmed by HPLC); IR (KBr): 3078, 2979, 2913, 2845, 1641, 1600, 1493, 1434, 1342, 1290, 1174, 1090, 972, 919, 838, 722, 684, 648 cm<sup>-1</sup>; <sup>1</sup>H NMR (CDCl<sub>3</sub>, 300 MHz): δ 7.25–7.30 (m, 4H), 5.80–5.89 (m, 1H), 5.58–5.66 (m, 1H), 5.15–5.19 (m, 2H), 4.90–5.04 (m, 2H), 3.91 (s, 1H), 2.42–2.56 (m, 2H), 2.02–2.11 (m, 2H). <sup>13</sup>C NMR (CDCl<sub>3</sub>, 75 MHz): δ 131.59, 130.37, 129.77, 129.70, 125.34, 124.85, 115.71, 115.37, 62.03, 58.93, 36.14, 31.29. HRMS (EI<sup>+</sup>) calcd for C<sub>14</sub>H<sub>15</sub>ClO (M<sup>+</sup>): 234.0811; found: 235.0814.

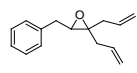

**2,2-diallyl-3-benzyloxirane (5c)** The title compound was obtained according to the general procedure. Colourless oil; Yield: 78%; Compound purity: 99.17% (confirmed by HPLC); IR (KBr): 3078, 2978, 2916, 1641, 1605, 1495, 1454, 1308, 1031, 997, 917, 741, 699, 656 cm<sup>-1</sup>; <sup>1</sup>H NMR (CDCl<sub>3</sub>, 300 MHz): δ 7.24–7.31 (m, 5H), 5.67–5.91 (m, 2H), 5.06–5.18 (m, 4H), 3.03–3.05 (m, 1H), 2.91–2.92 (m, 2H), 2.27–2.55 (m, 4H). <sup>13</sup>C NMR (CDCl<sub>3</sub>, 75 MHz): δ 138.20, 133.40, 133.14, 128.99, 128.84, 126.77, 118.57, 62.99, 62.64, 39.75, 35.83, 35.09. HRMS (EI<sup>+</sup>) calcd for C<sub>15</sub>H<sub>18</sub>O (M<sup>+</sup>): 214.1358; found: 215.1350.

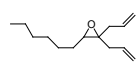

**2,2-diallyl-3-hexyloxirane (5d)** The title compound was obtained according to the general procedure. Light yellow oil; Yield: 75%; Compound purity: 99.60% (confirmed by HPLC); IR (KBr): 3079, 2957, 2858, 1641, 1353, 1112, 996, 915 cm<sup>-1</sup>; <sup>1</sup>H NMR (CDCl<sub>3</sub>, 300 MHz): δ 5.72–5.83 (m, 2H), 5.07–5.15 (m, 4H), 2.77–2.81 (t, 1H), 2.21–2.36 (m, 4H), 1.30–1.65 (m, 10H), 0.87–0.91 (m, 3H). <sup>13</sup>C NMR (CDCl<sub>3</sub>, 75 MHz): δ 133.63, 133.43, 118.24, 118.16, 62.96, 62.25, 39.87, 35.62, 31.96, 29.38, 28.63, 26.85, 22.76, 14.25. HRMS (EI<sup>+</sup>) calcd for C<sub>14</sub>H<sub>24</sub>O (M<sup>+</sup>): 208.1827; found: 209.1821.

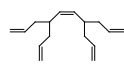

**(Z)-4,7-diallyldeca-1,5,9-triene (5e)** The title compound was obtained according to the general procedure. Light yellow oil; Yield: 43%; Compound purity: 99.99% (confirmed by HPLC); IR (KBr): 3076, 2979, 2839, 1639, 1222, 996, 915, 704 cm<sup>-1</sup>; <sup>1</sup>H NMR (CDCl<sub>3</sub>, 400 MHz): δ 5.74–5.82 (m, 4H), 5.67 (s, 2H), 5.09–5.16 (m, 8H), 2.26–2.37 (m, 8H), 1.80 (s, 2H). <sup>13</sup>C NMR (CDCl<sub>3</sub>, 100 MHz): δ 132.01, 131.47, 117.02, 71.56, 43.61. HRMS (EI<sup>+</sup>) calcd for C<sub>16</sub>H<sub>24</sub>O (M<sup>+</sup>): 216.1878; found: 217.1876.

## NMR spectrum of compounds

3a

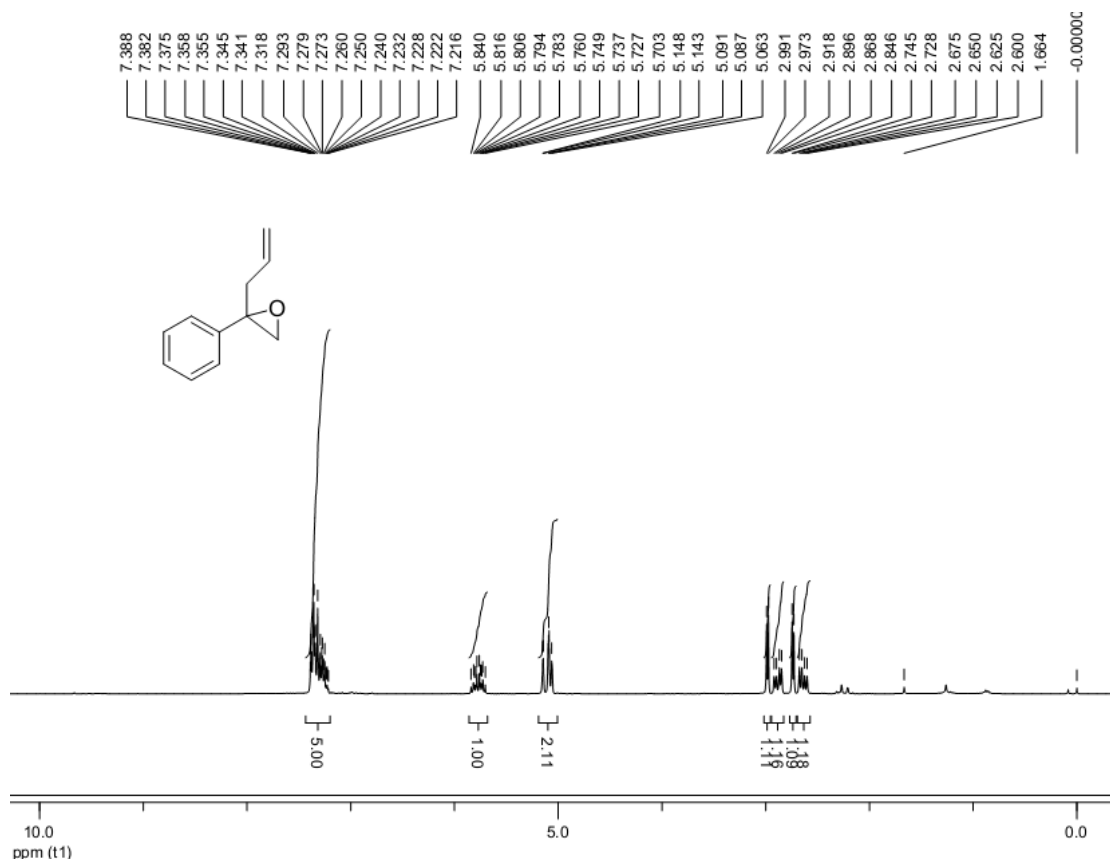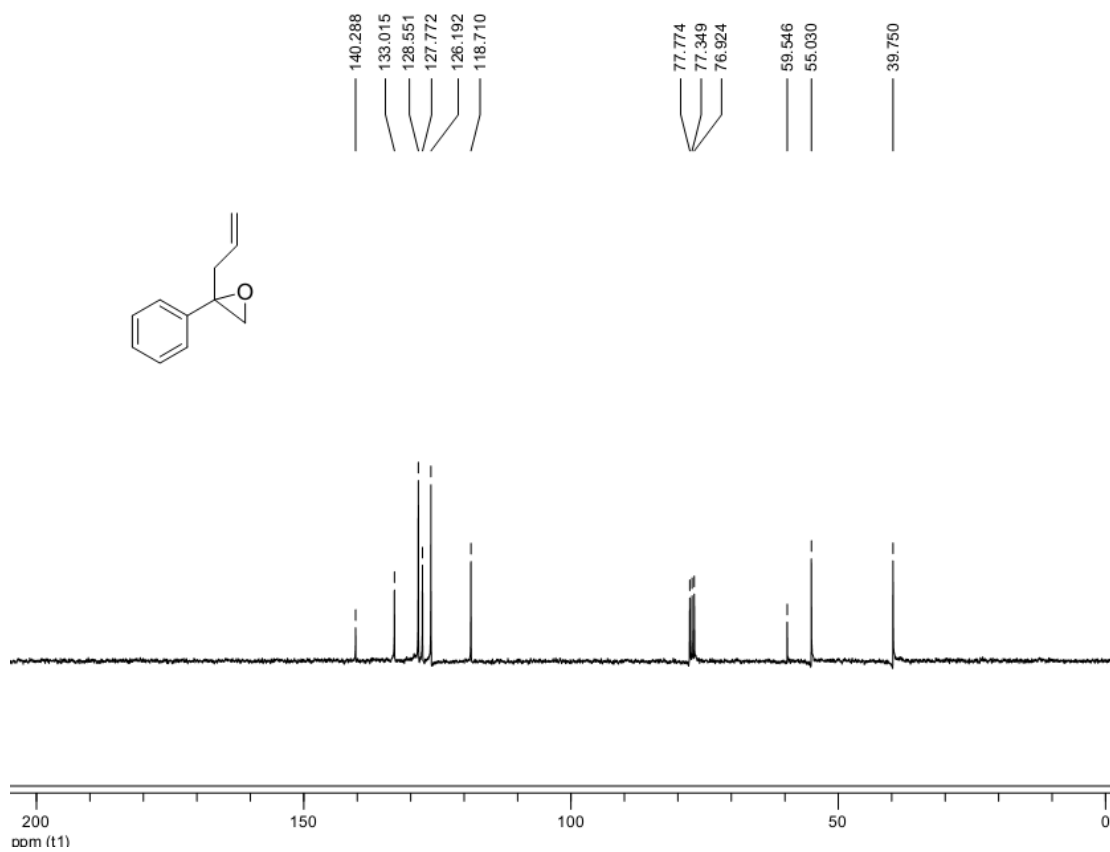

3b

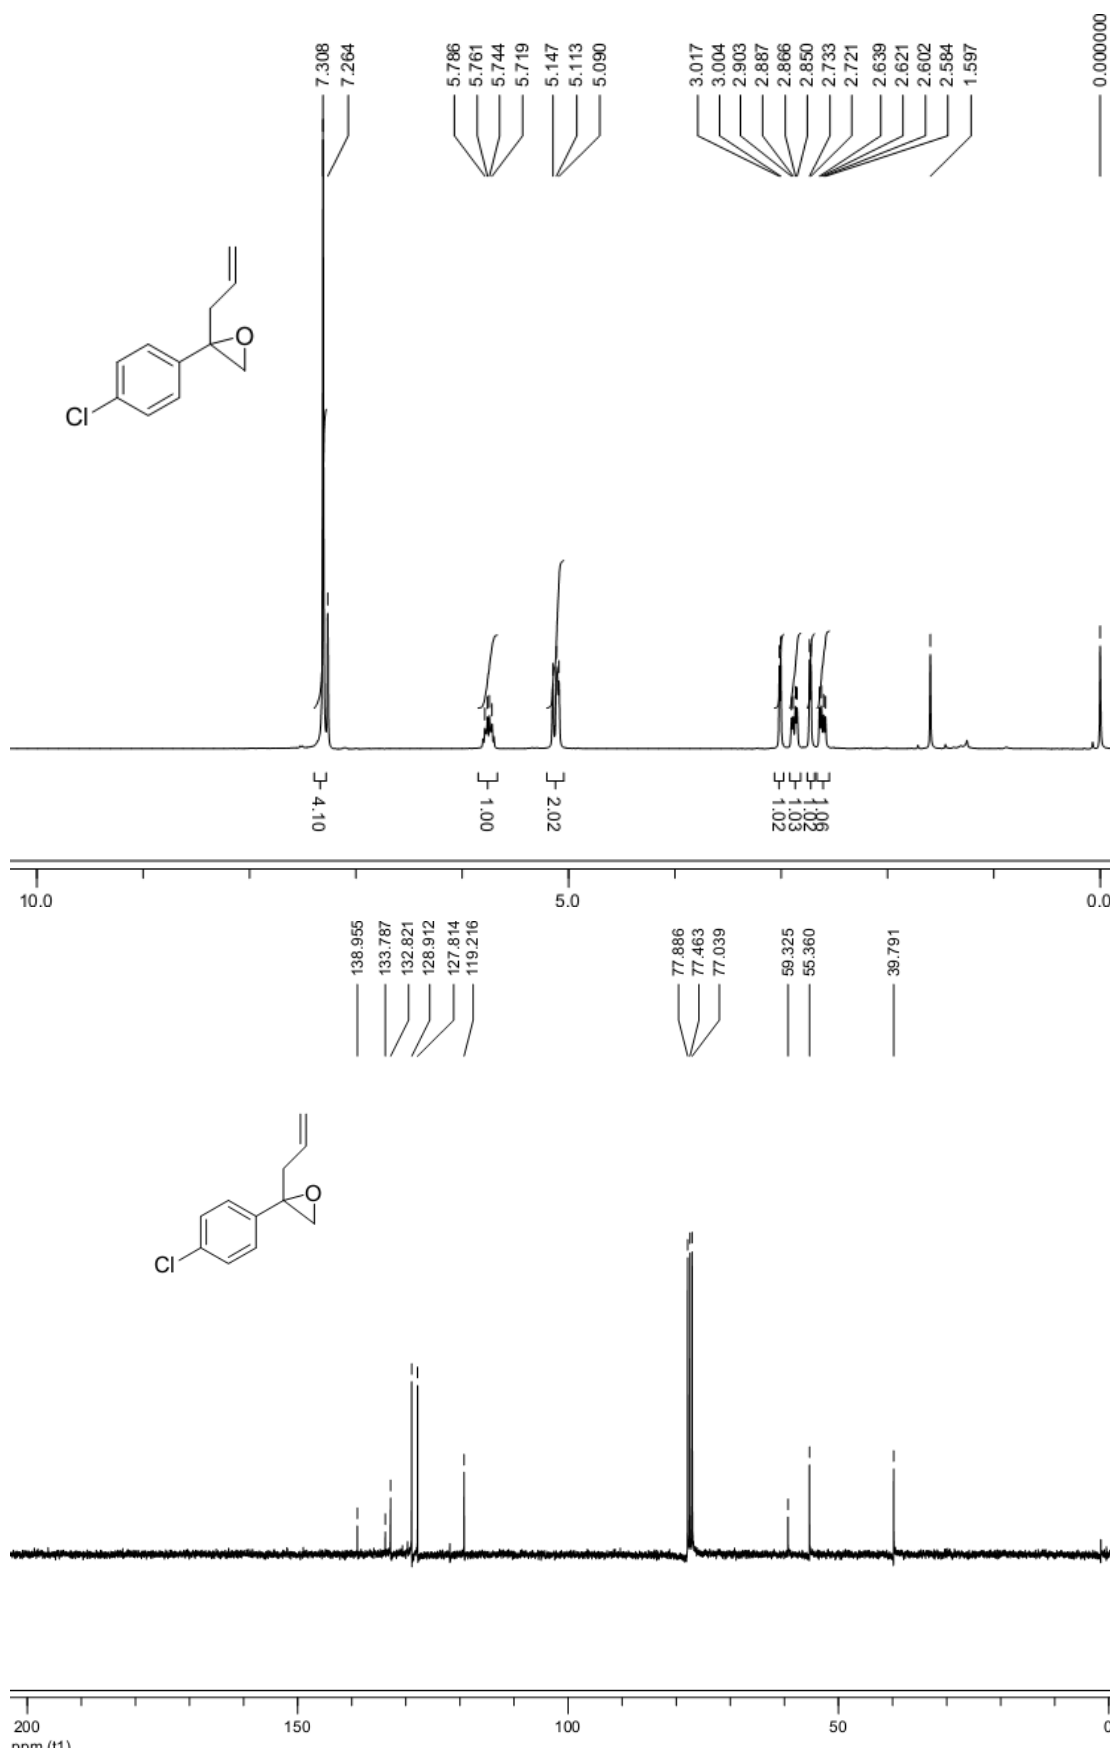



3c

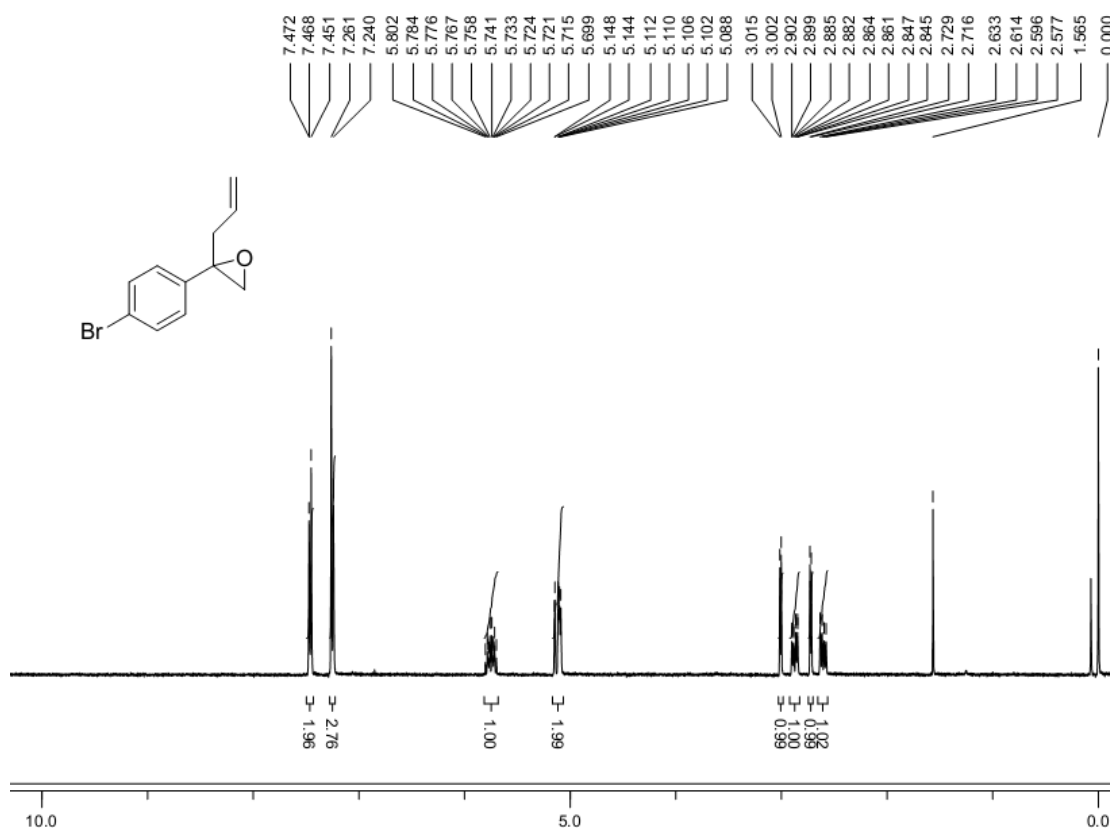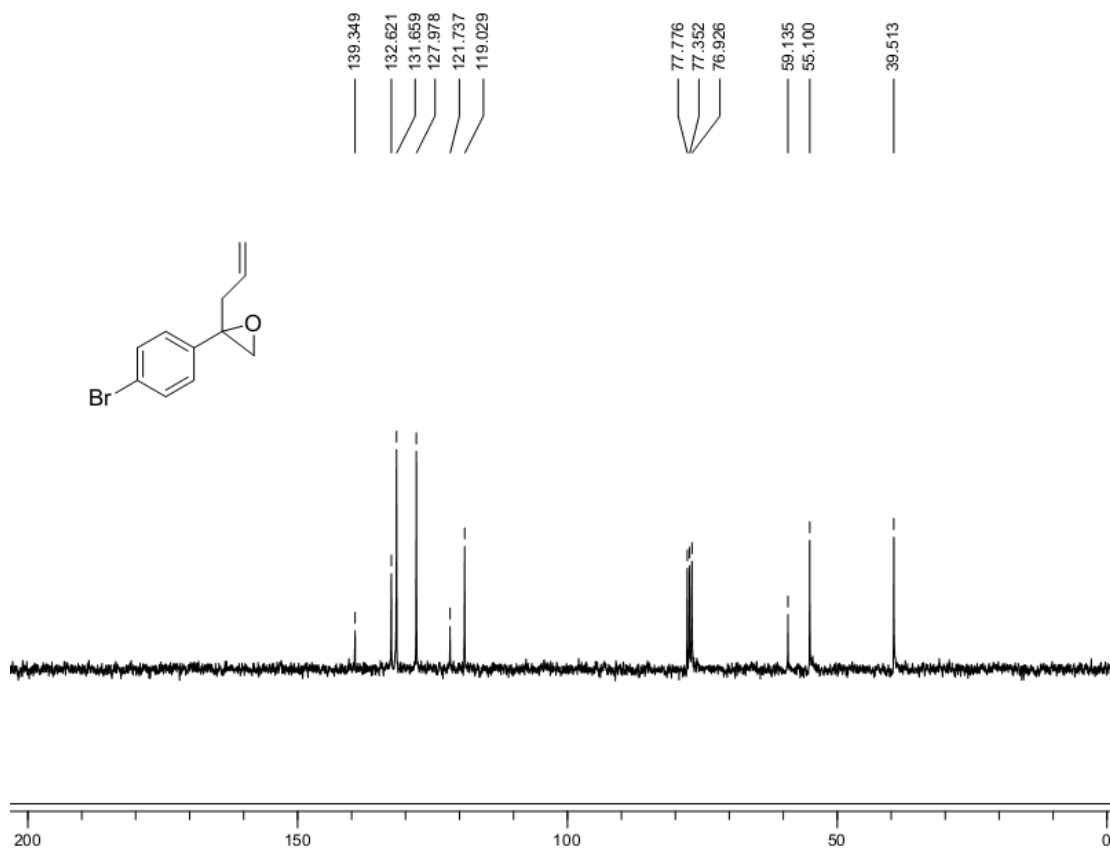

3d

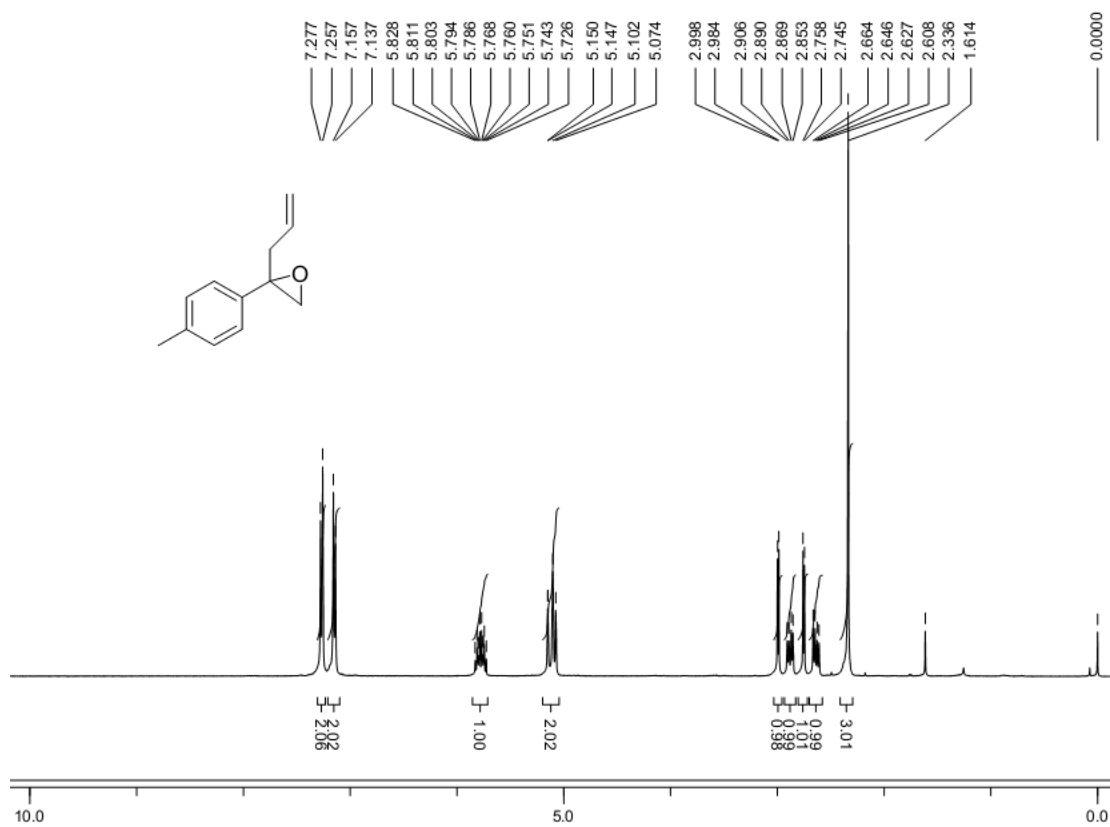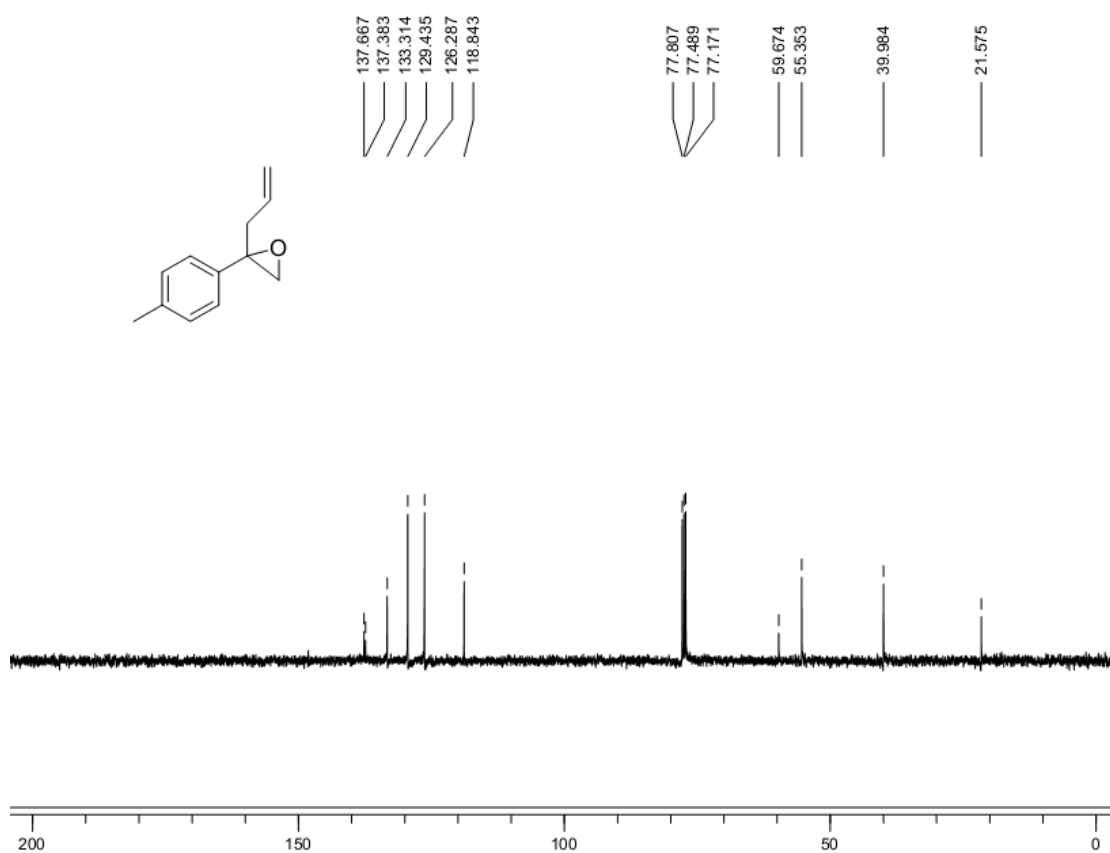

3e

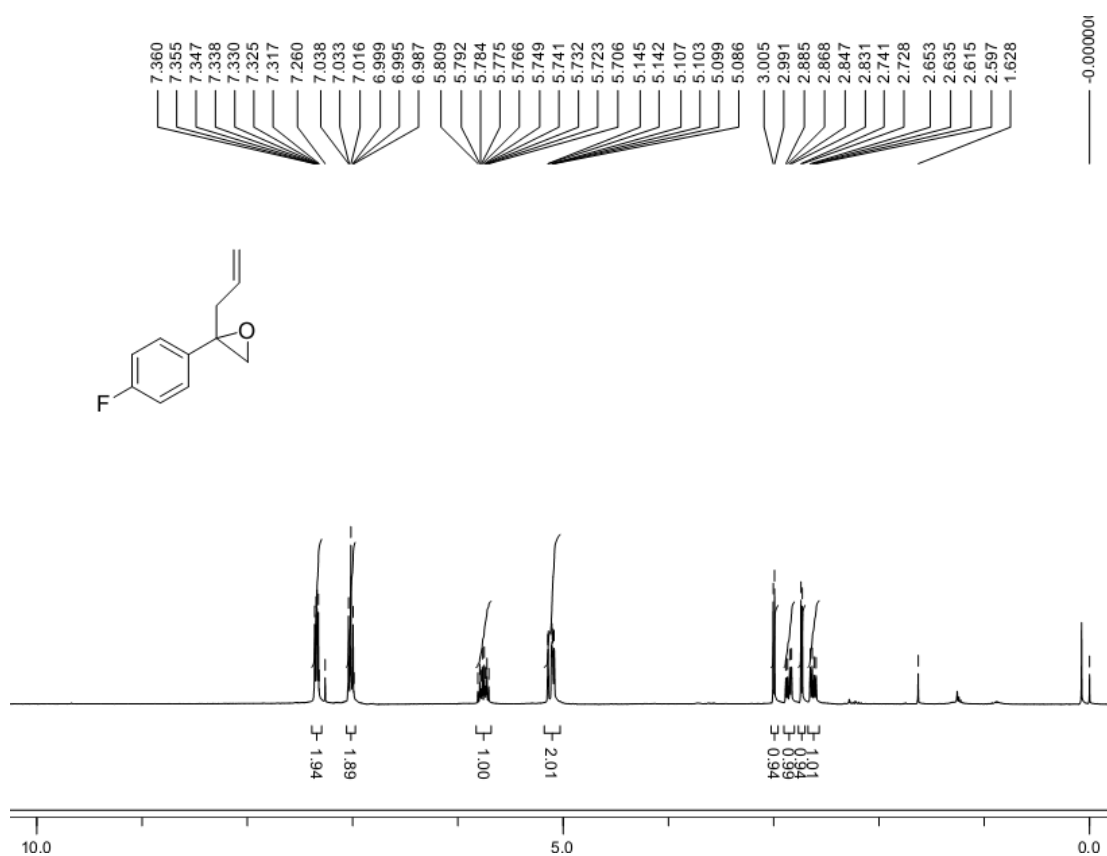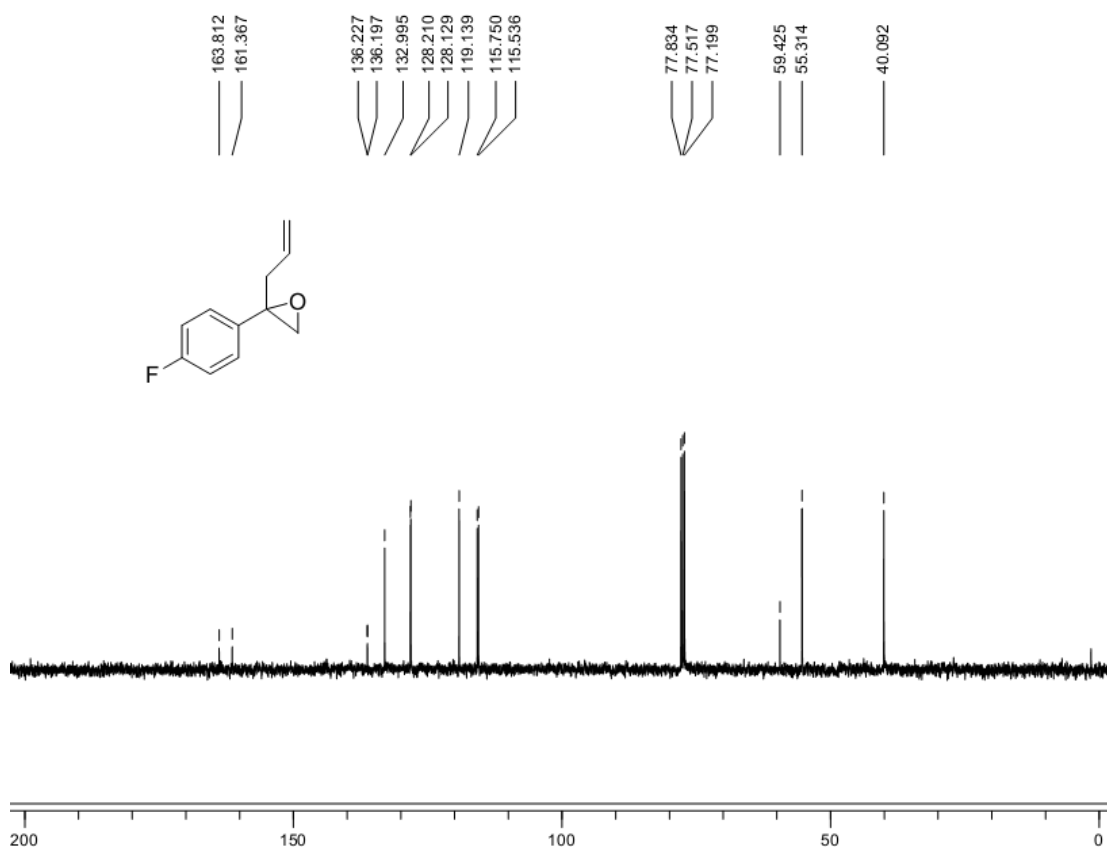

3f

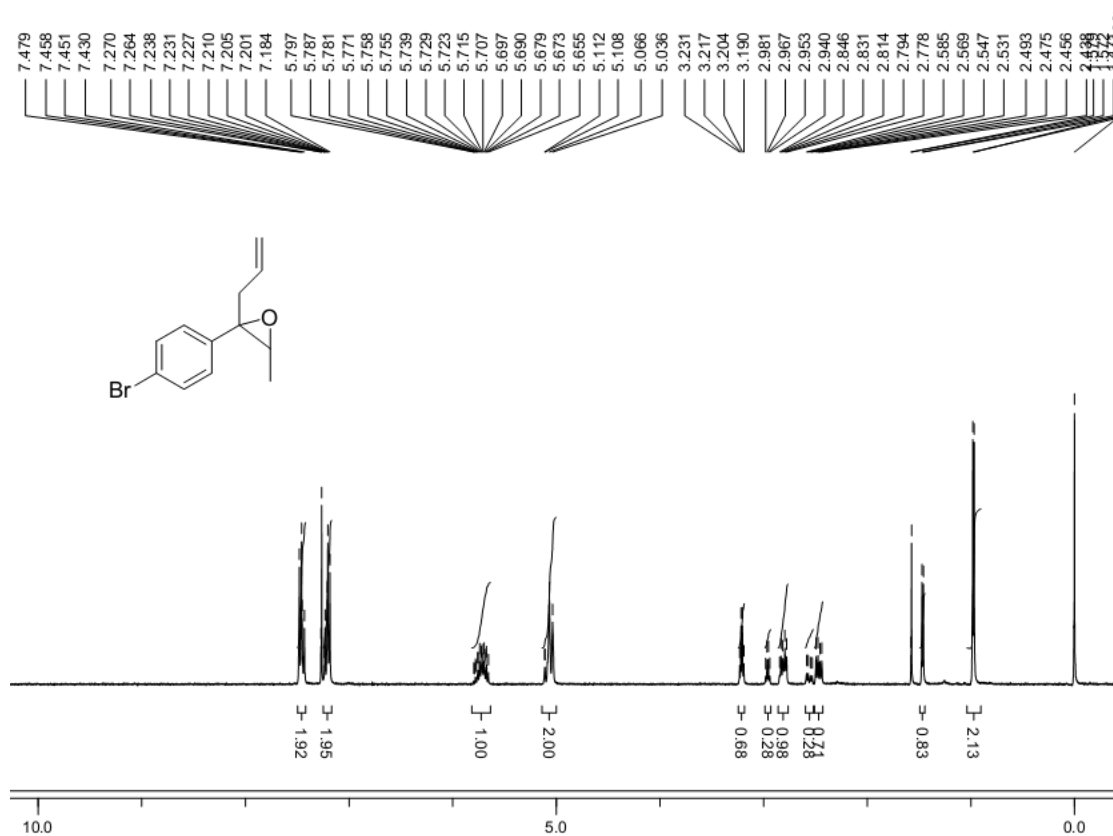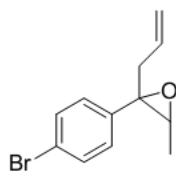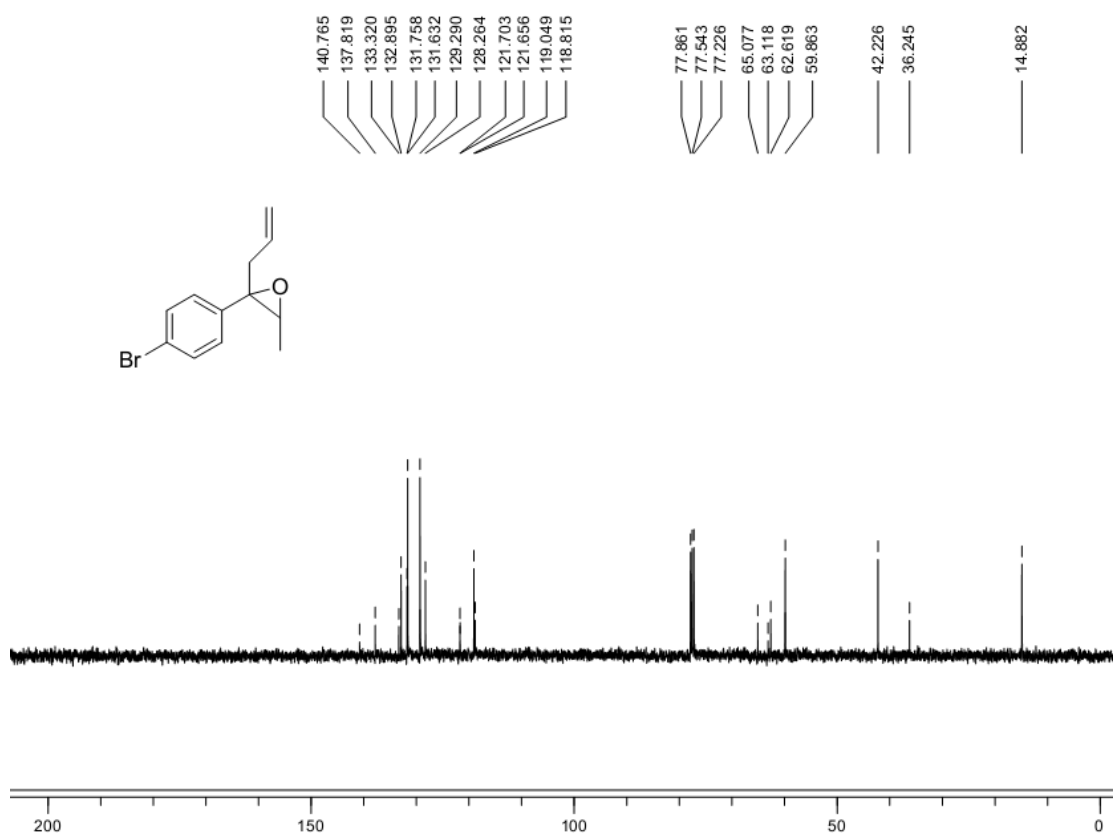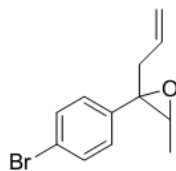

3g

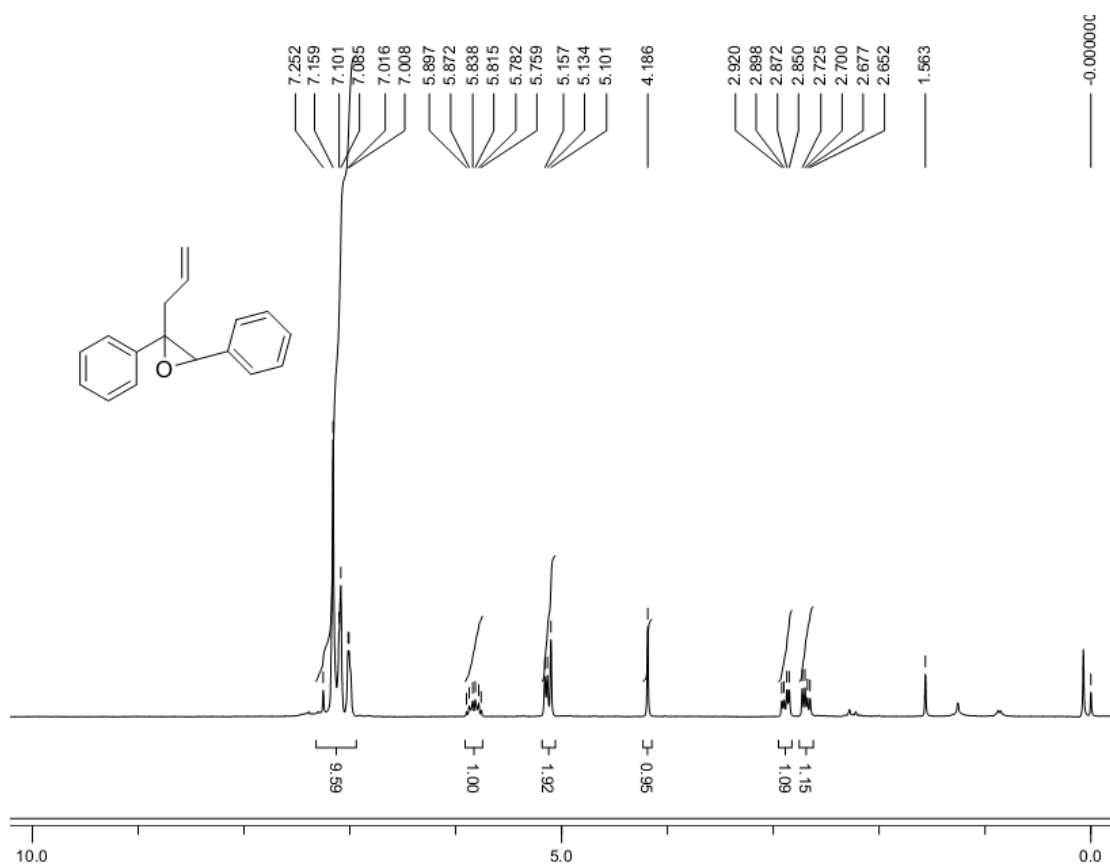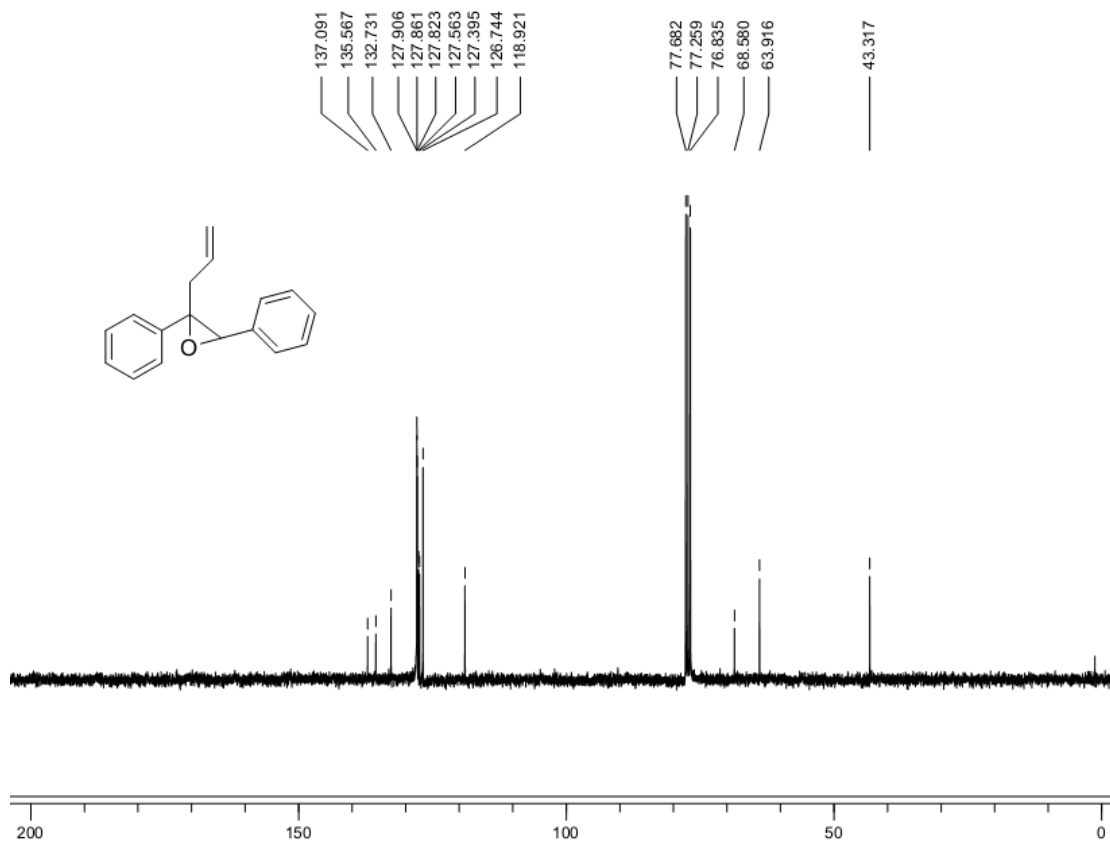

3h

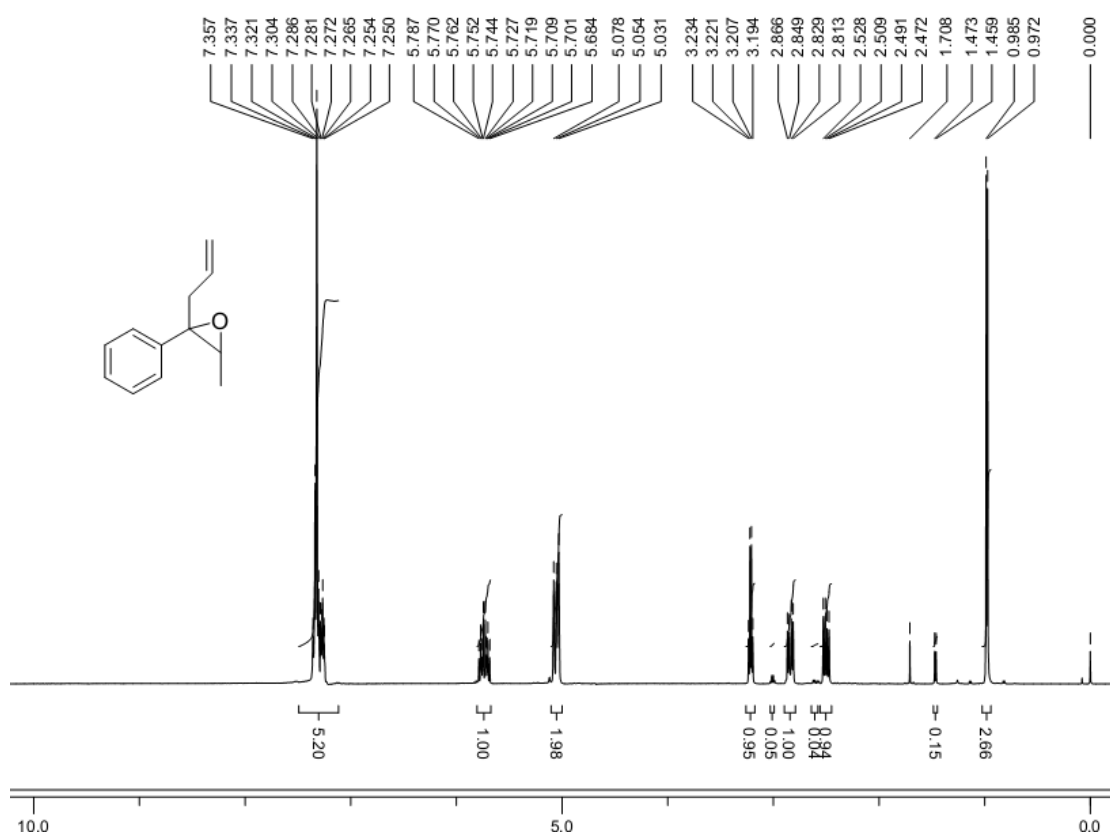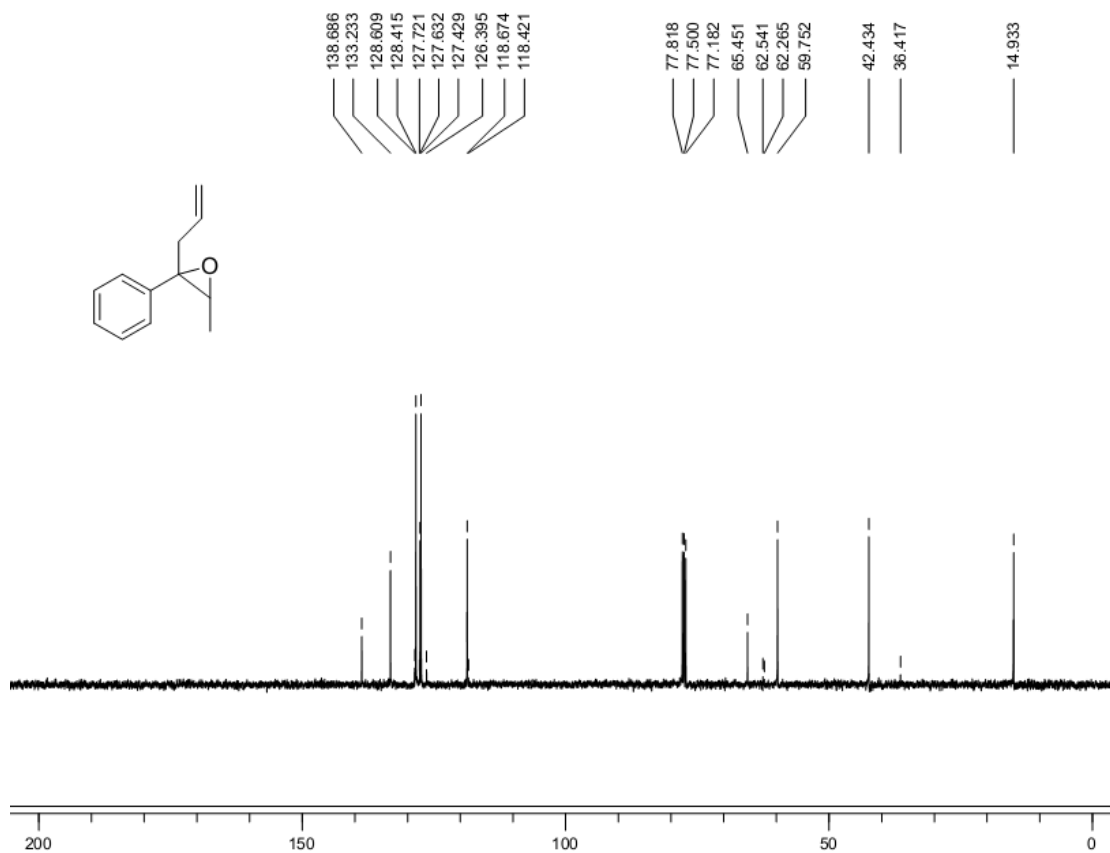

3i

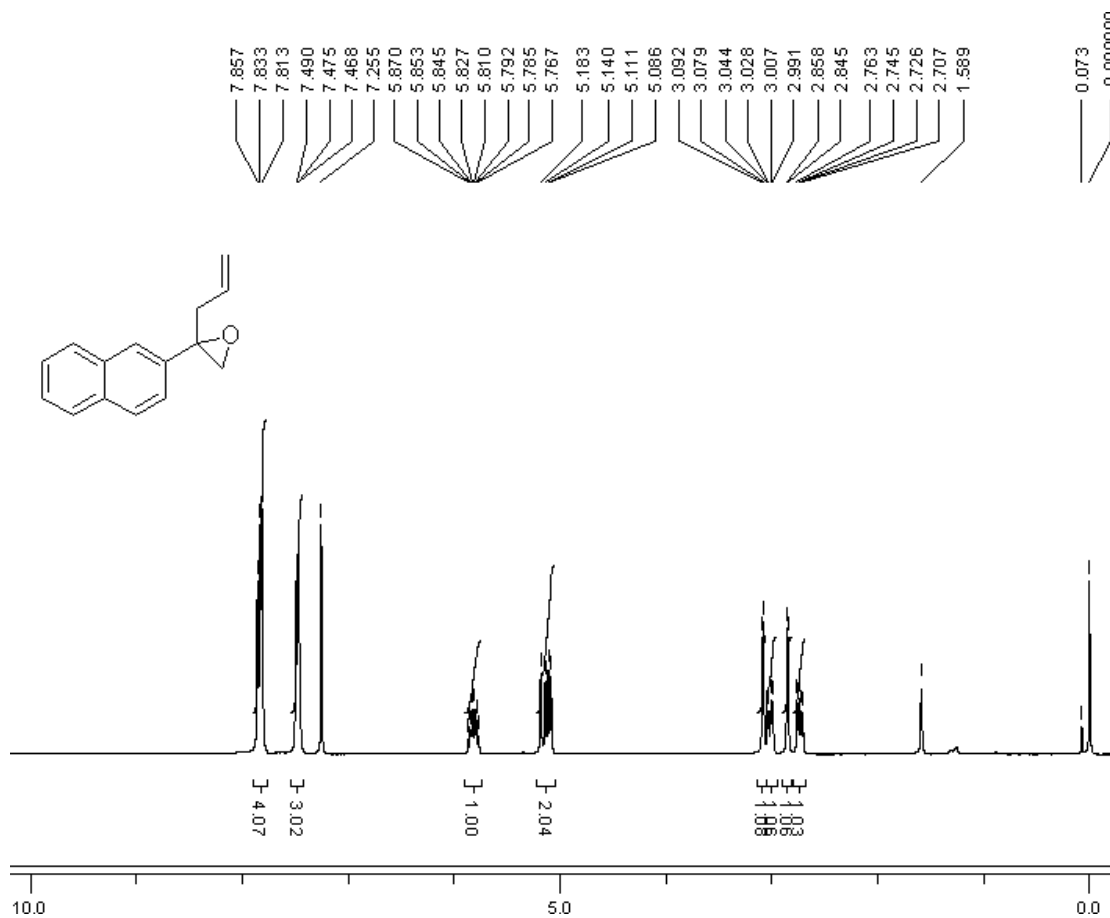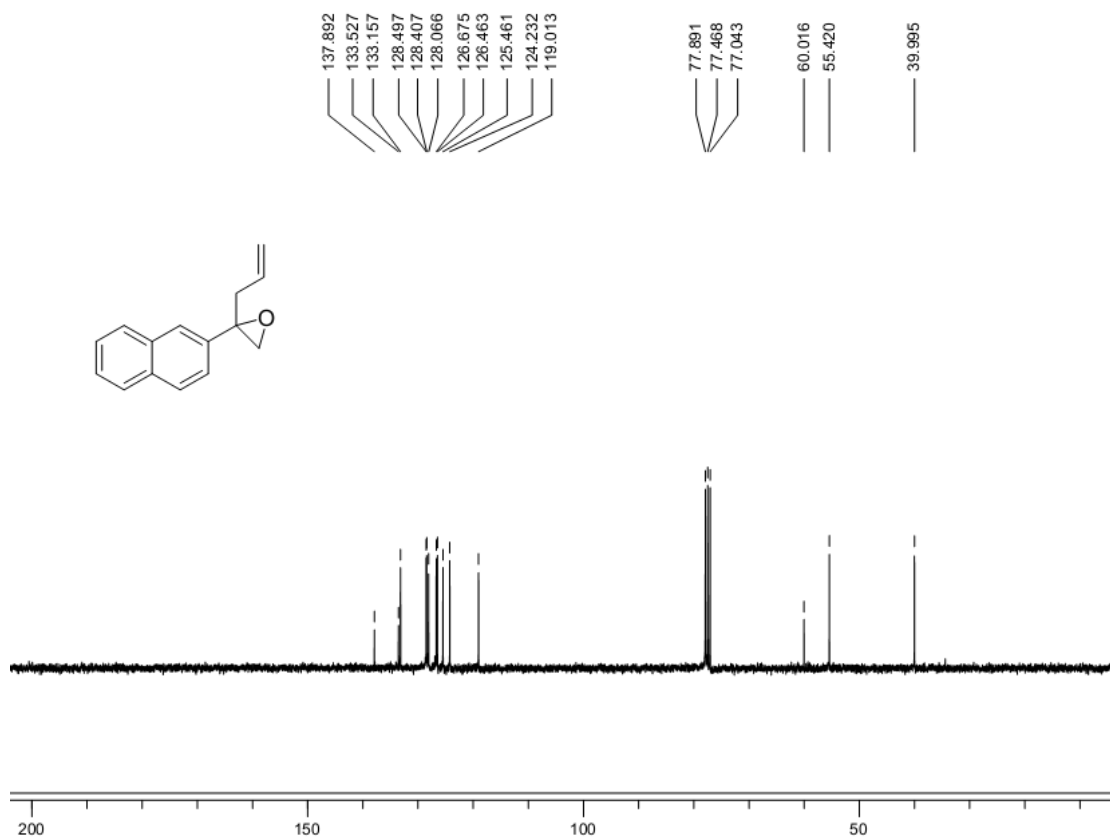

3j

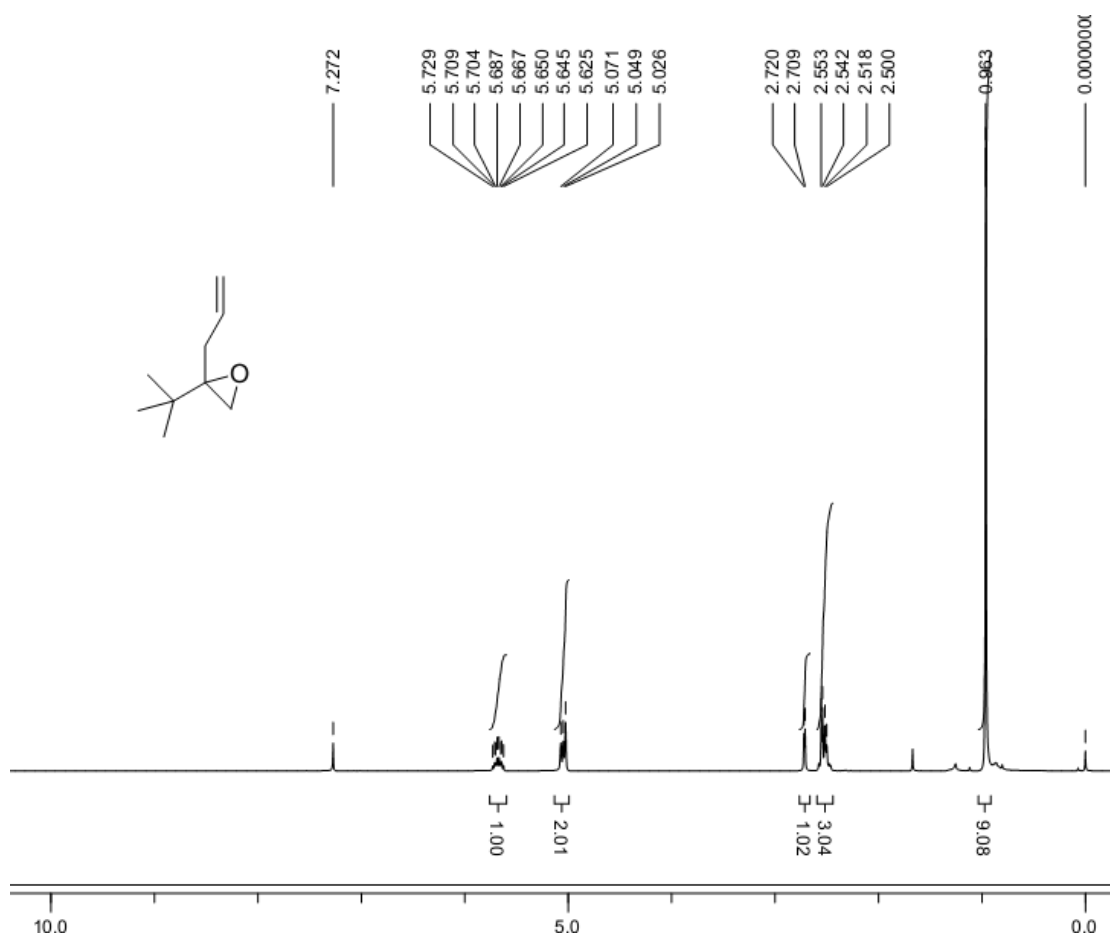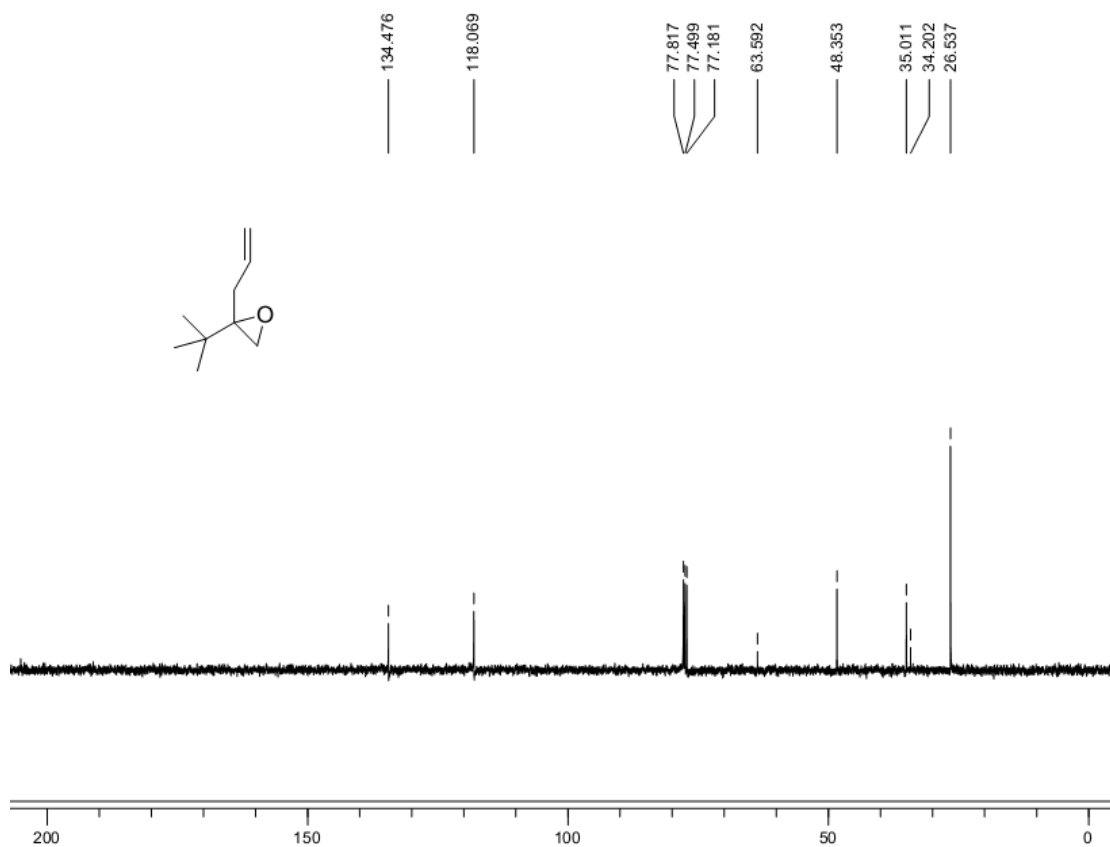



3k

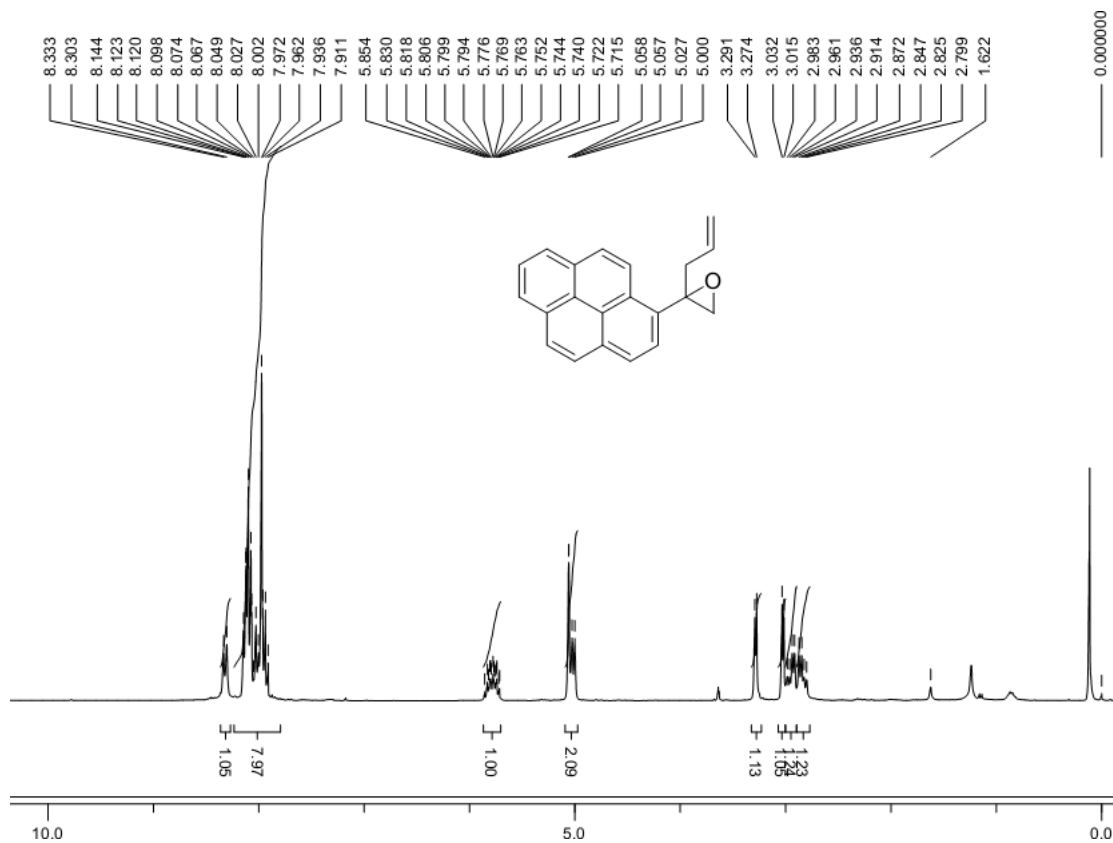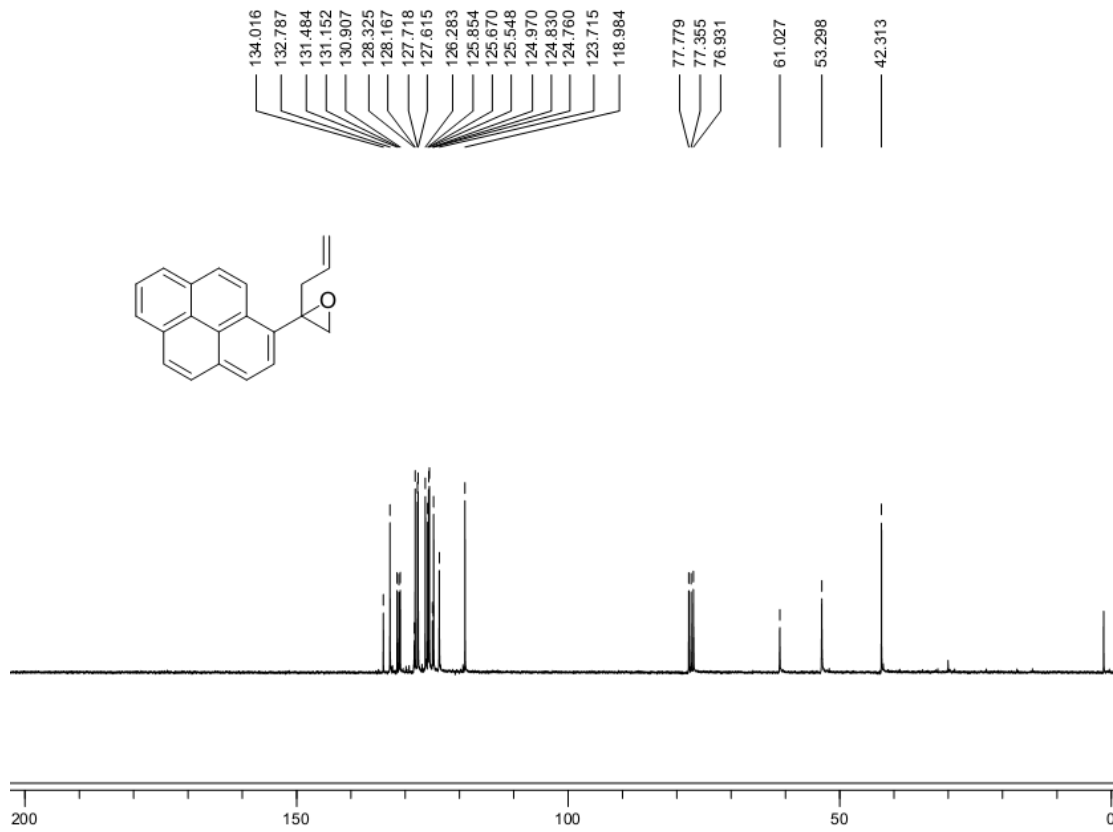

31

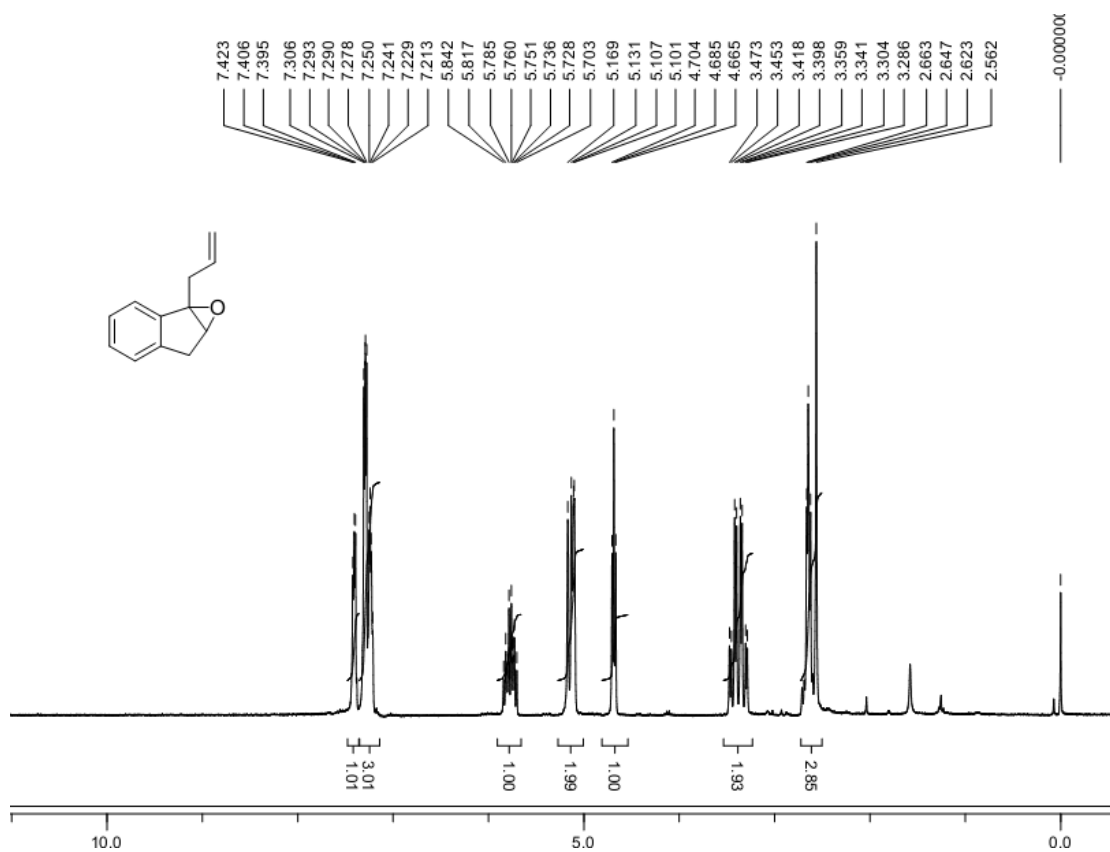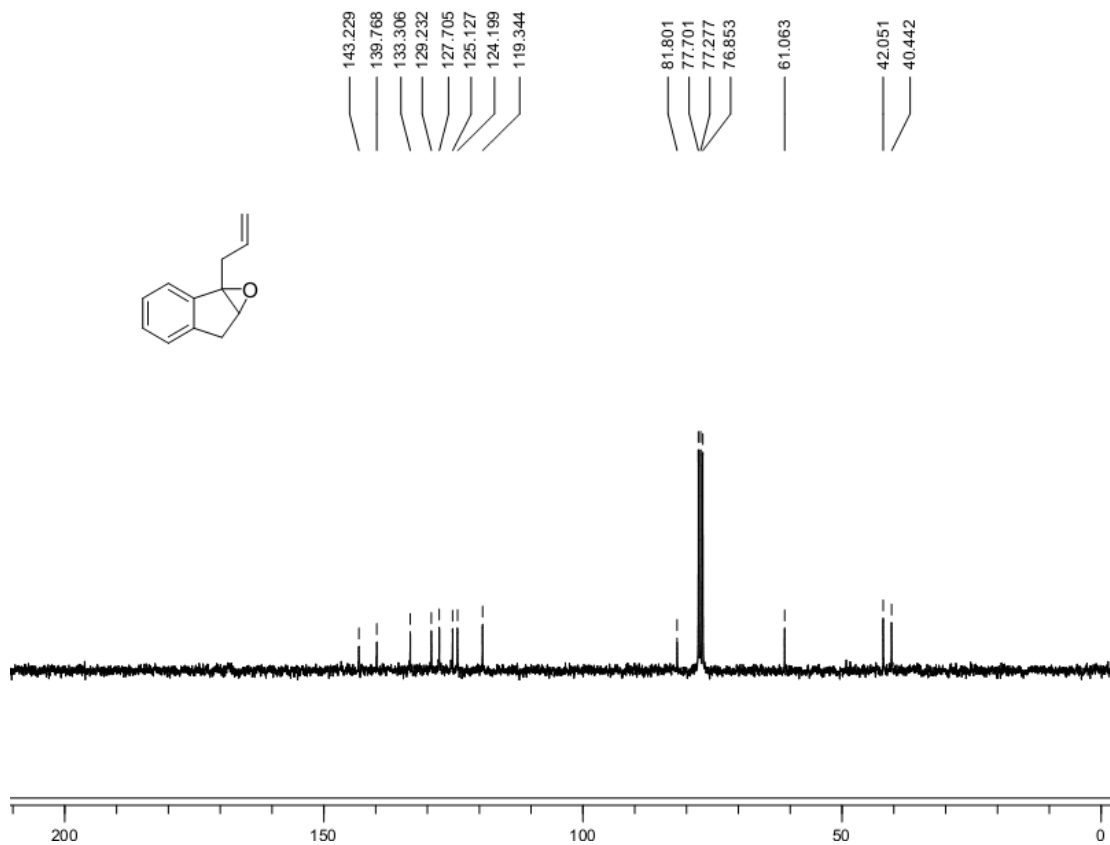

5a

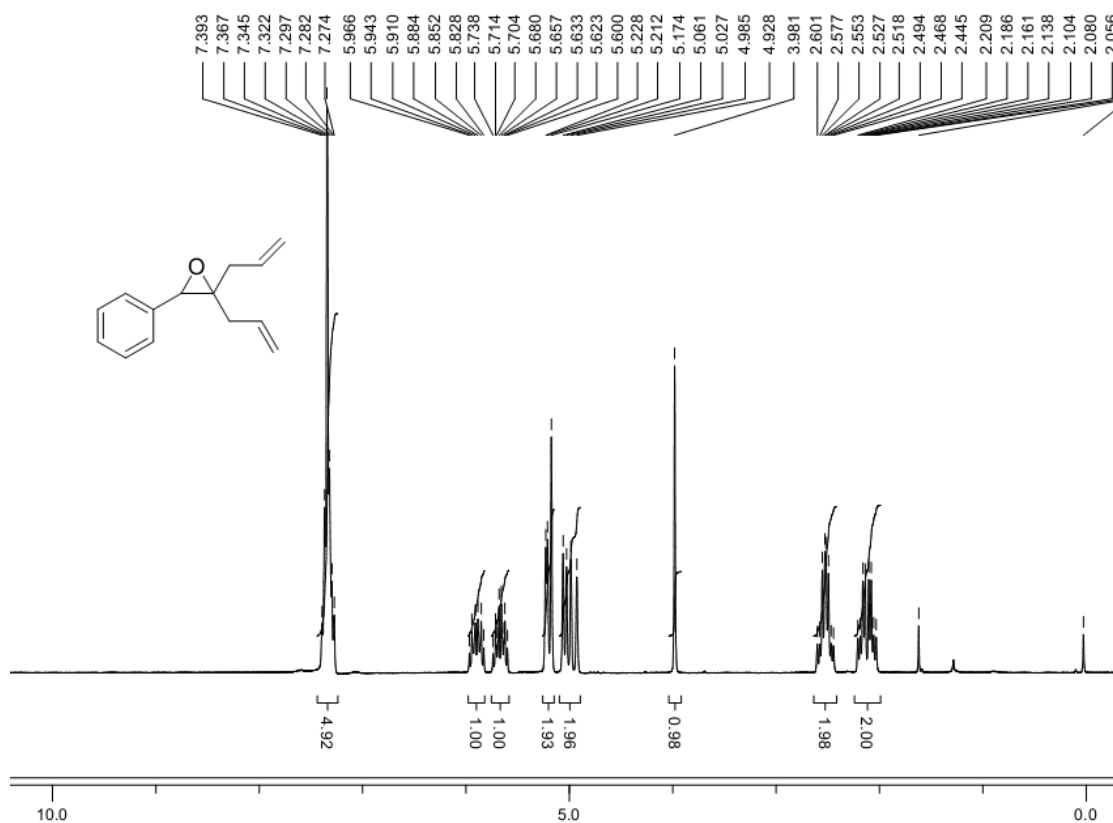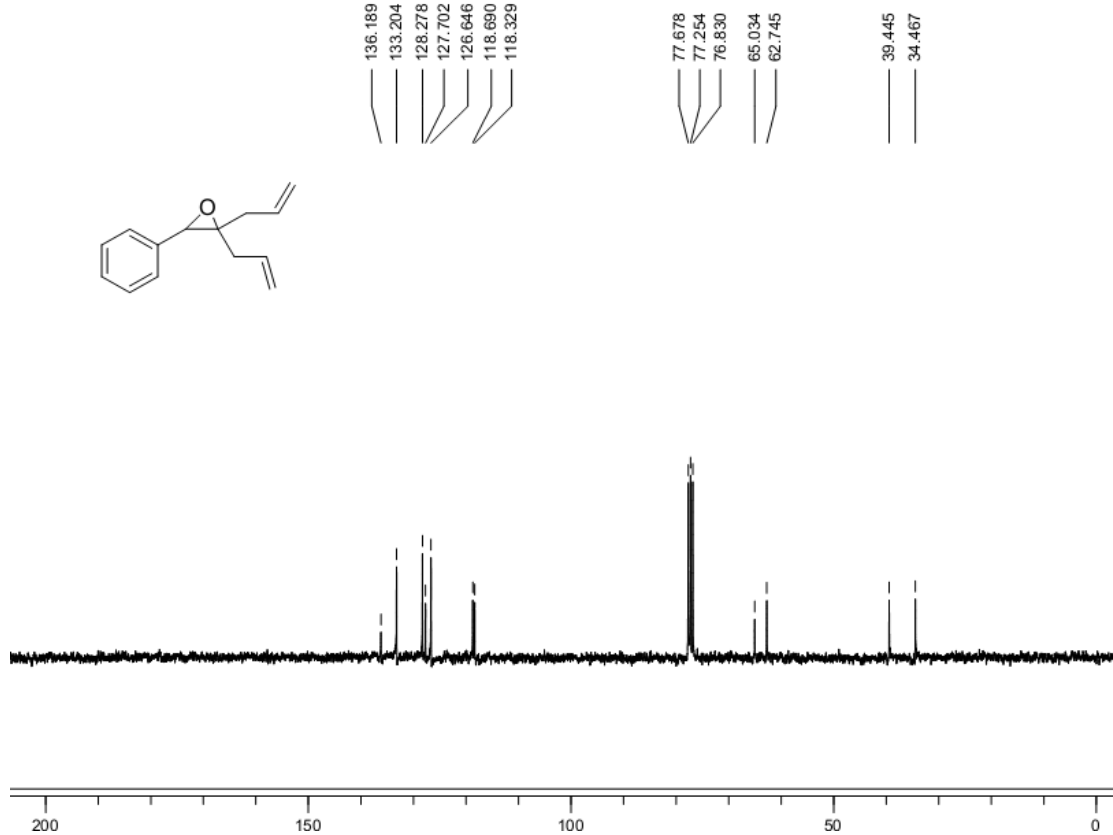

5b

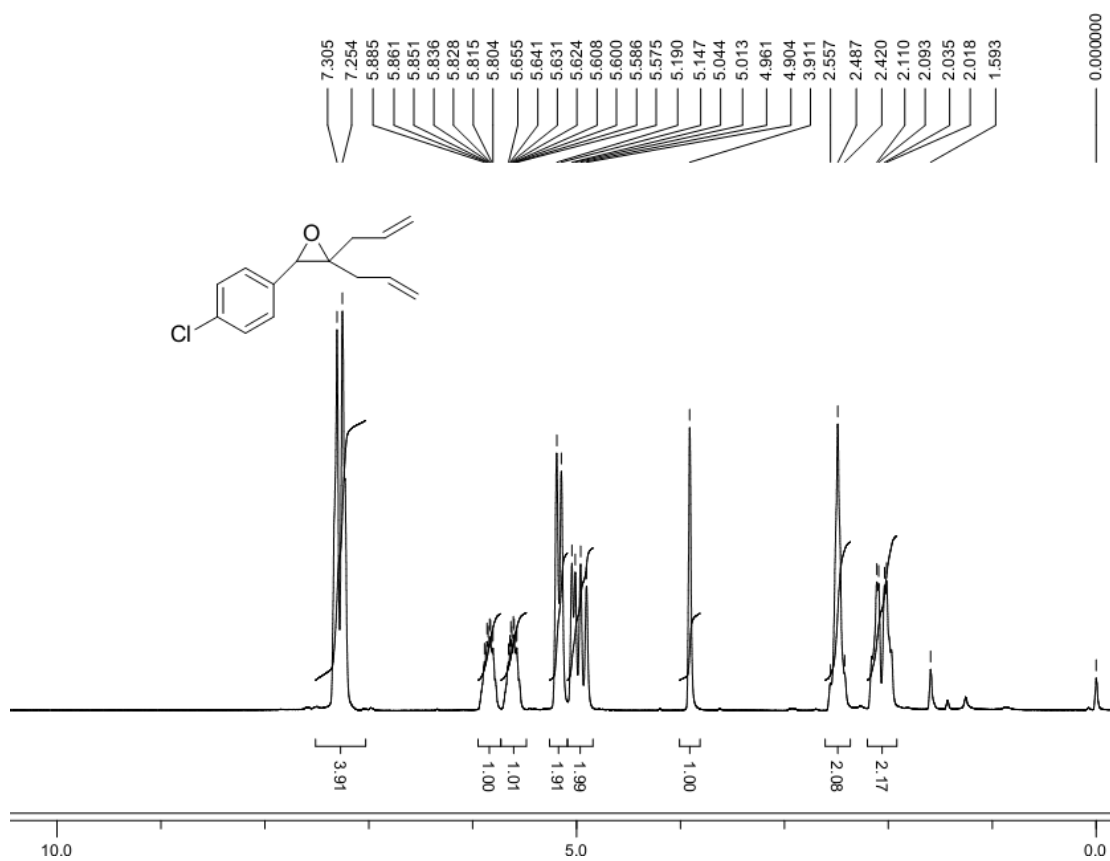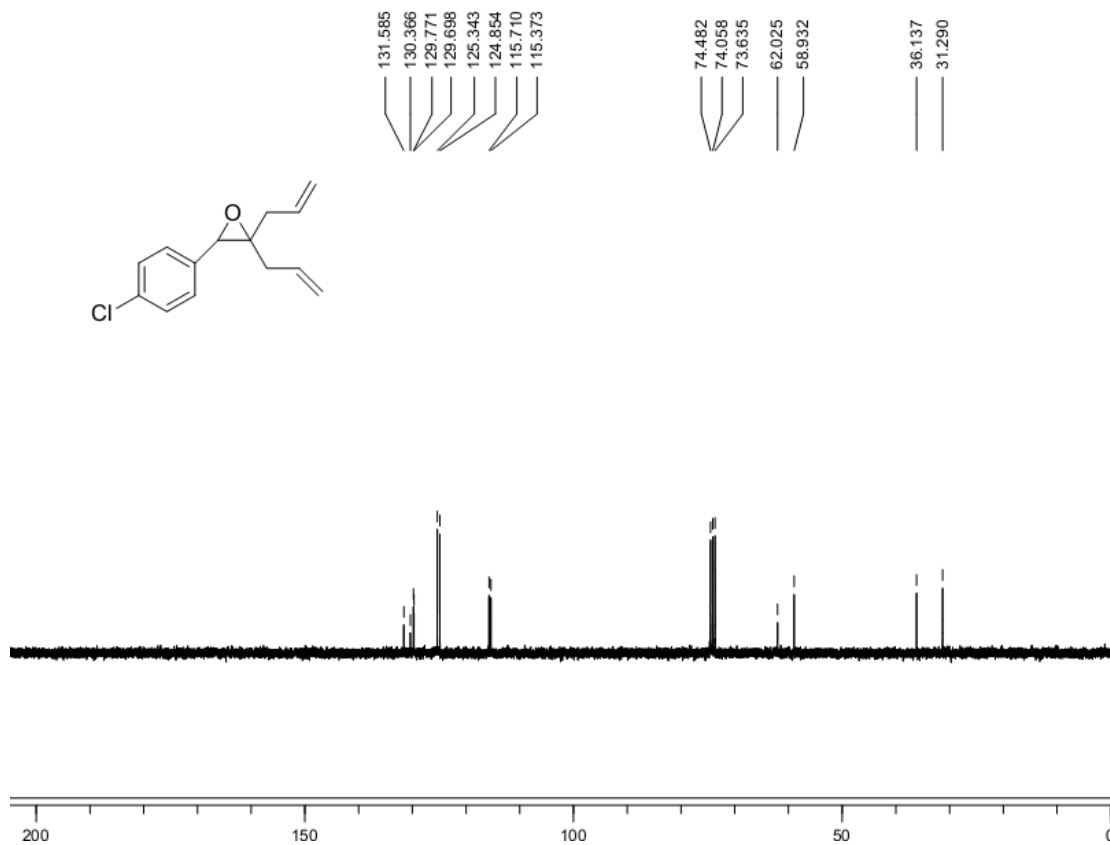

5c

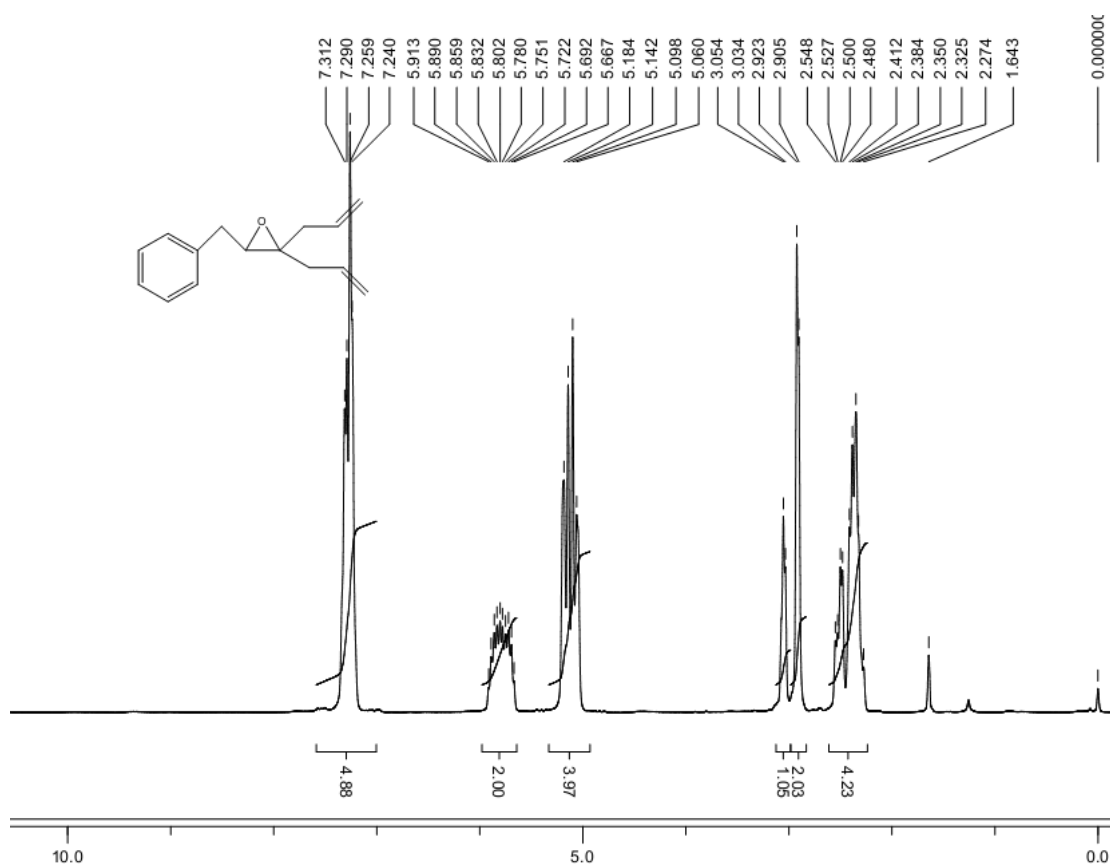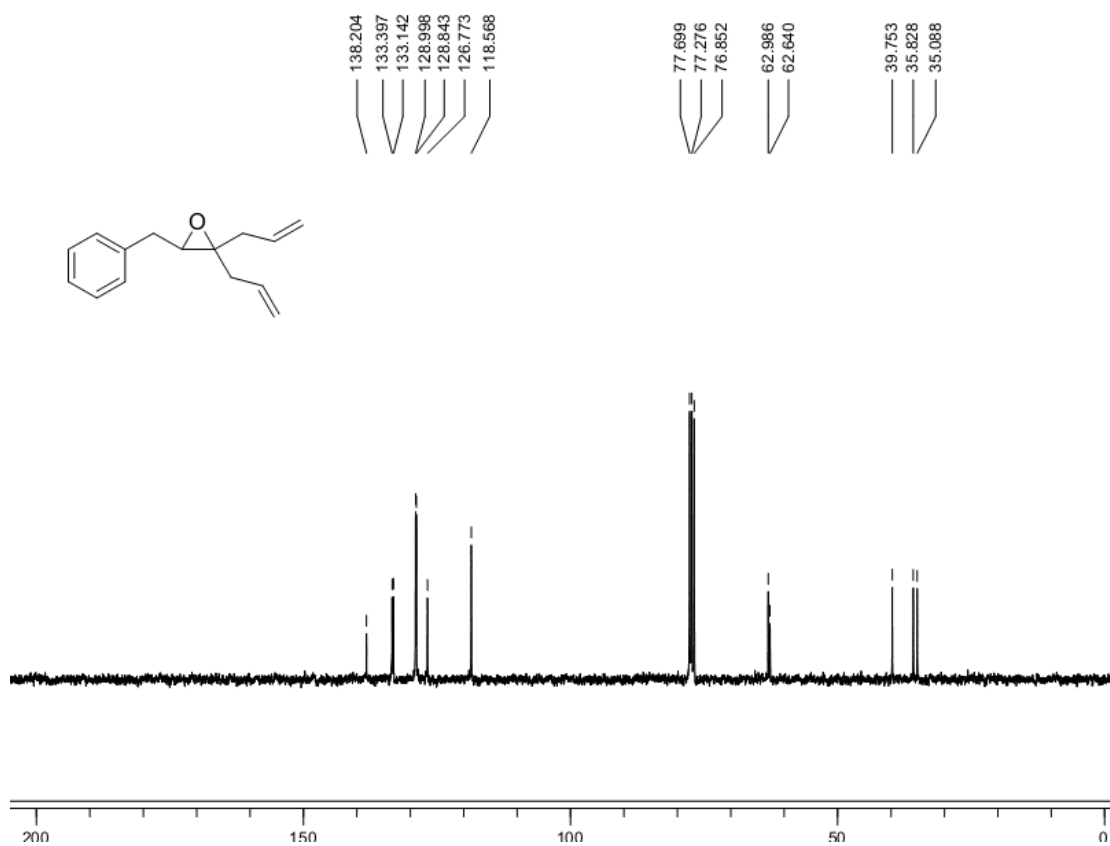

5d

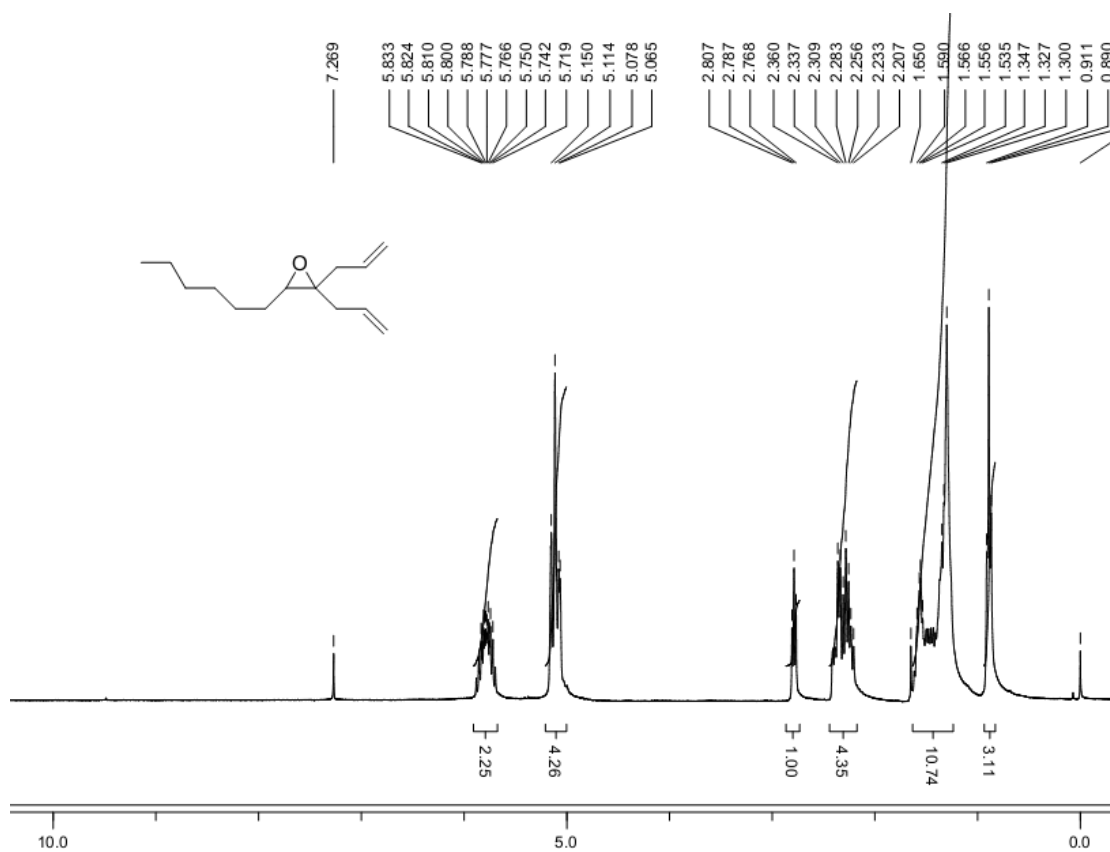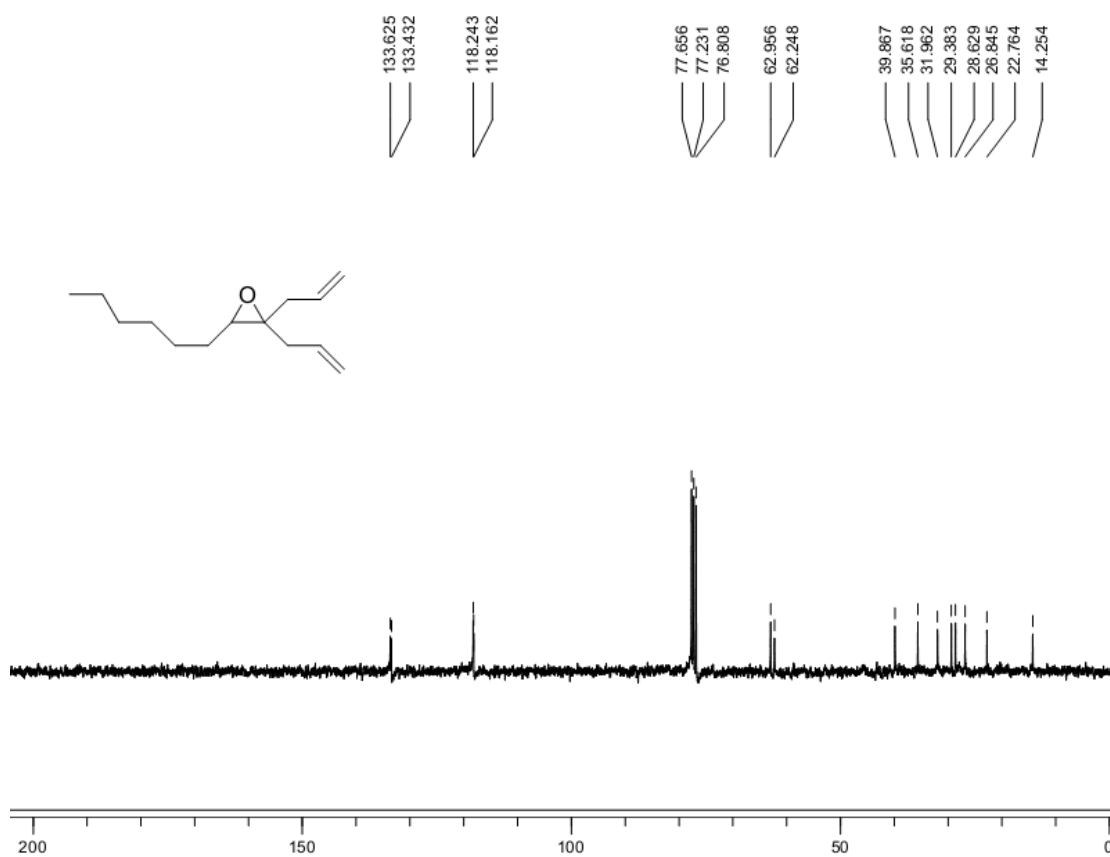

5e

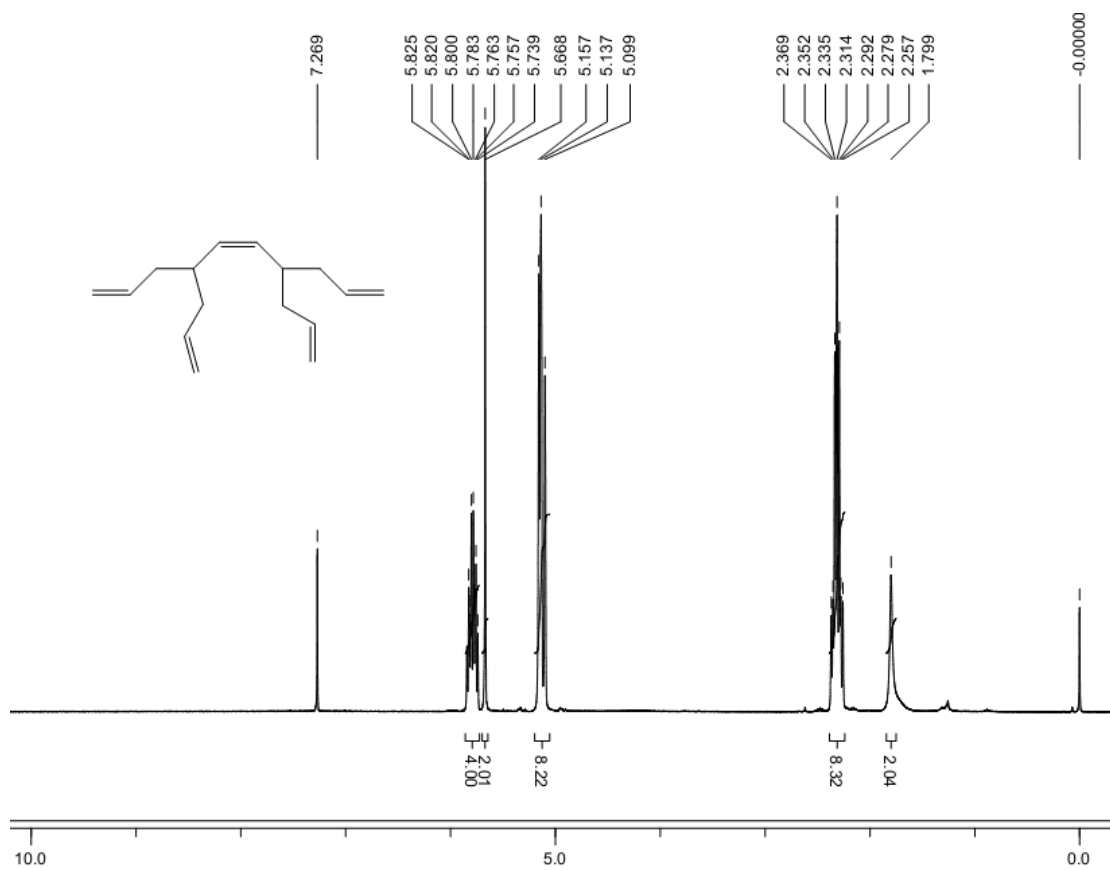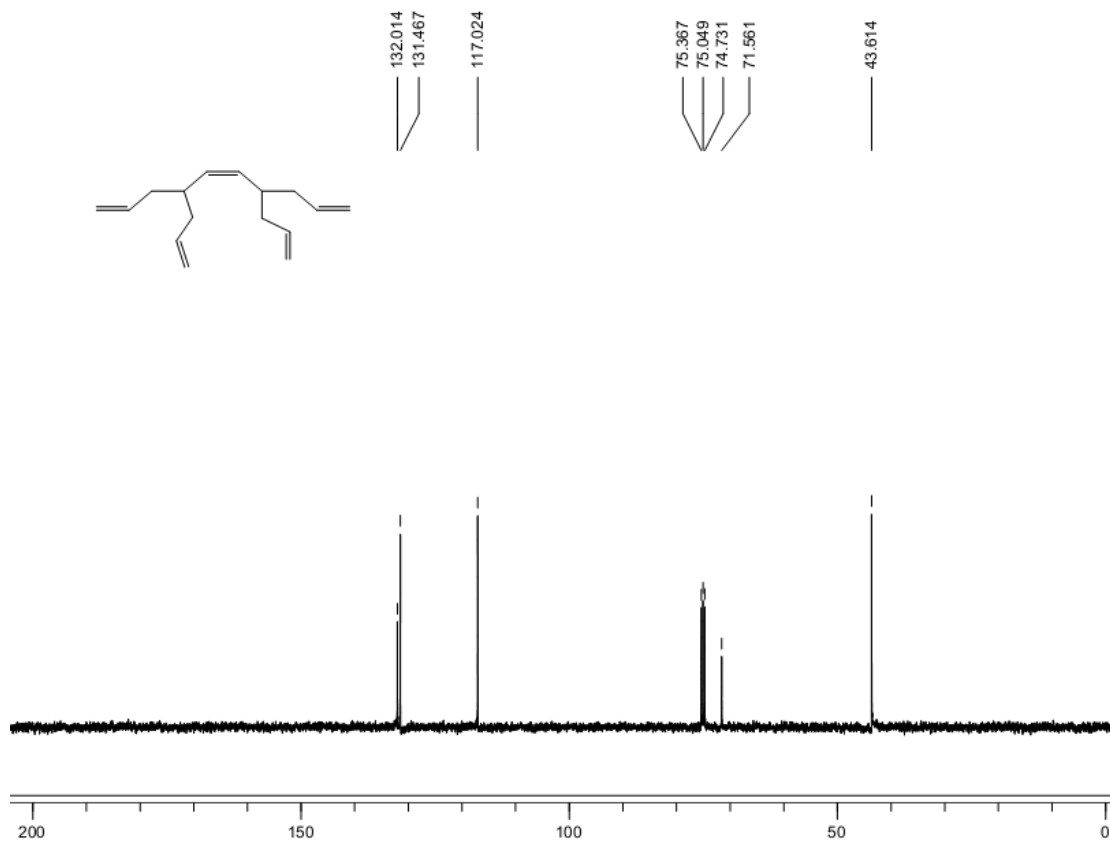

Supplement: c2ob00051b.pdf [file c2ob00051b.pdf]
